# Supplementary material for: Protective mitochondrial fission induced by stress-responsive protein GJA1-20k
Source: eLife. 2021 Oct 5;10:e69207. doi: 10.7554/eLife.69207 (PMC8492060; doi:10.7554/eLife.69207)
Supplement: Figure 1—figure supplement 1—source data 1. [file elife-69207-fig1-figsupp1-data1.xlsx]

## Sheet: fig1 sup1C
HEK293						HEK293
siControl	siGja1	siGja1 +M6L	siGja1 +GJA1-20k			siControl	siGja1	siGja1 +M6L	siGja1 +GJA1-20k
1.00251	1.06137	1.19565	0.447215		Mean	1	1.19673	1.13815	0.558582
0.812542	1.21172	1.14508	0.620133		SD	0.238537	0.255927	0.182806	0.150363
1.47785	1.16685	1.09713	0.723699		N	52	57	60	64
0.949283	1.16859	1.34094	0.69759		p-value vs Control	-----	0.0045	0.0407	<0.0001
1.12688	0.880127	1.32574	0.517016		p-value vs siGja1	-----	-----	>0.9999	<0.0001
1.36759	1.61218	1.10392	0.350912		p-value vs M6L	-----	-----	-----	<0.0001
1.36099	1.54718	0.971326	0.387818		Test	Dunn's multiple comparison
1.64045	1.20204	1.2572	0.847064
0.743358	1.2261	1.10089	0.441382
1.22638	1.25457	1.0266	0.307472		Table Analyzed				Data 1
0.445364	0.845605	1.56081	0.73573
0.798436	1.07809	1.10512	0.441943		Kruskal-Wallis test
0.965493	1.08474	1.02884	0.425425		P value				<0.0001
0.964904	1.23732	1.05997	0.341041		Exact or approximate P value?				Approximate
0.877519	1.05274	0.999762	0.399344		P value summary				****
0.925081	1.34838	1.18858	0.517941		Do the medians vary signif. (P < 0.05)?				Yes
1.00282	0.990059	0.988881	0.367542		Number of groups				4
1.19427	1.52143	0.989049	0.493403		Kruskal-Wallis statistic				141.5
0.890083	0.952985	1.31677	0.595174
0.918687	1.55245	1.67716	0.3842		Data summary
0.893055	0.854888	1.051	0.447187		Number of treatments (columns)				4
1.23979	0.937028	1.57839	0.843222		Number of values (total)				233
0.975644	0.701993	1.21497	0.416086
0.881053	1.29787	1.02015	0.752416		Number of families			1
0.63895	1.37782	1.00055	0.314343		Number of comparisons per family			6
0.981702	1.46187	1.13653	0.810831		Alpha			0.05
0.889438	1.27052	1.49597	0.483644
0.596576	1.55584	1.04424	0.438101		Dunn's multiple comparisons test			Mean rank diff.	Significant?	Summary	Adjusted P Value
1.26483	1.06452	0.96395	0.490627		siControl vs. siGja1			-43.53	Yes	**	0.0045	A-B
0.848466	0.876958	0.99937	0.897066		siControl vs. siGja1+M6L			-34.58	Yes	*	0.0407	A-C
1.09315	0.744928	1.17635	0.444635		siControl vs. siGja1+GJA1-20k			85.4	Yes	****	<0.0001	A-D
0.921296	1.04146	1.07099	0.779338		siGja1 vs. siGja1+M6L			8.955	No	ns	>0.9999	B-C
1.10826	1.07758	1.05495	0.865601		siGja1 vs. siGja1+GJA1-20k			128.9	Yes	****	<0.0001	B-D
0.913555	1.21923	1.11348	0.596604		siGja1+M6L vs. siGja1+GJA1-20k			120	Yes	****	<0.0001	C-D
1.10868	1.16045	1.02565	0.719745
0.58491	1.34173	0.941655	0.628041		Test details			Mean rank 1	Mean rank 2	Mean rank diff.	n1	n2	Z
1.19503	1.41759	1.1869	0.482606		siControl vs. siGja1			120.9	164.4	-43.53	52	57	3.368
1.5594	1.71796	0.872331	0.596857		siControl vs. siGja1+M6L			120.9	155.5	-34.58	52	60	2.708
0.925081	1.17655	0.963025	0.687803		siControl vs. siGja1+GJA1-20k			120.9	35.5	85.4	52	64	6.786
0.74246	0.986301	0.912406	0.552772		siGja1 vs. siGja1+M6L			164.4	155.5	8.955	57	60	0.7183
0.895607	1.25476	1.00806	0.498339		siGja1 vs. siGja1+GJA1-20k			164.4	35.5	128.9	57	64	10.5
1.13524	1.55576	1.20182	0.496684		siGja1+M6L vs. siGja1+GJA1-20k			155.5	35.5	120	60	64	9.906
0.90775	1.28707	1.5389	0.629331
1.00691	0.899562	1.18642	0.735421				siControl	siGja1	siGja1+M6L	siGja1+GJA1-20k
0.940898	1.00296	1.01151	0.464602		Number of values		52	57	60	64
1.1056	1.069	0.901497	0.483616
1.03869	1.16578	1.10577	0.548733		Minimum		0.4454	0.702	0.8723	0.3075
1.34448	2.06484	1.38778	0.685896		25% Percentile		0.8896	1.022	1.014	0.4415
1.04713	1.33183	1.11485	0.412833		Median		0.9571	1.177	1.099	0.5143
0.91751	0.979655	1.07708	0.580619		75% Percentile		1.122	1.347	1.2	0.6951
0.710686	1.186	1.05164	0.405878		Maximum		1.64	2.065	1.677	0.8971
0.897655	0.924913	1.57416	0.511547
	1.08928	1.02183	0.404616		Mean		1	1.197	1.138	0.5586
	1.04486	1.09427	0.623975		Std. Deviation		0.2385	0.2559	0.1828	0.1504
	1.34484	1.06412	0.628658		Std. Error of Mean		0.03308	0.0339	0.0236	0.0188
	1.36369	1.22624	0.466425
	1.3714	1.22745	0.436418		Lower 95% CI		0.9336	1.129	1.091	0.521
		1.13003	0.50448		Upper 95% CI		1.066	1.265	1.185	0.5961
		1.13224	0.70533
		0.931111	0.753005		Mean ranks		120.9	164.4	155.5	35.5
			0.484261
			0.702862
			0.580114
			0.716015

## Sheet: fig1 sup 1E
Neo CM				Neo CM
WT	WT+GFP			WT	WT+GFP
1.04119	1.06873		Mean	1	0.984228
0.924368	0.846027		SEM	0.0401554	0.0379977
1.18888	1.20275		N	46	35
0.765157	0.714207		p-value vs WT	-----	0.8907
1.06576	0.677639		Test	Mann-Whitney
1.10132	0.800931
0.680927	1.0722
0.552142	0.70156		Table Analyzed			WTvsGFP
0.563272	0.797318
0.437016	1.27596		Column B			WT+GFP
0.538627	1.19939		vs.			vs.
0.683565	0.883897		Column A			WT
0.6694	1.30772
1.3044	1.05897		Mann Whitney test
0.663365	1.14638		P value			0.8907
1.11881	0.581845		Exact or approximate P value?			Exact
1.37345	1.0391		P value summary			ns
1.15972	0.825358		Significantly different (P < 0.05)?			No
1.64353	1.07769		One- or two-tailed P value?			Two-tailed
0.783731	1.19556		Sum of ranks in column A,B			1901 , 1420
1.13796	0.942544		Mann-Whitney U			790
0.725626	0.857988
0.847401	0.959563		Difference between medians
1.09384	1.25992		Median of column A			1.015, n=46
0.918623	1.15397		Median of column B			0.9596, n=35
0.843534	0.937955		Difference: Actual			-0.05502
1.28557	1.11971		Difference: Hodges-Lehmann			-0.005908
1.28116	1.41916
0.803208	1.32362				WT	WT+GFP
0.83497	0.763495		Number of values		46	35
0.938172	0.583146
1.61064	0.85376		Minimum		0.437	0.5818
0.933221	1.1729		25% Percentile		0.7983	0.8009
0.985255	0.938135		Median		1.015	0.9596
1.12737	0.688877		75% Percentile		1.167	1.173
1.24192			Maximum		1.644	1.419
1.03451
0.99465			Mean		1	0.9842
1.12203			Std. Deviation		0.2723	0.2248
0.894231			Std. Error of Mean		0.04016	0.038
1.25565
0.98764			Lower 95% CI		0.9191	0.907
1.20517			Upper 95% CI		1.081	1.061
1.36572
1.15097			Mean ranks		41.33	40.57
1.12231
