# Supplementary material for: Protective mitochondrial fission induced by stress-responsive protein GJA1-20k
Source: eLife. 2021 Oct 5;10:e69207. doi: 10.7554/eLife.69207 (PMC8492060; doi:10.7554/eLife.69207)
Supplement: Figure 1—figure supplement 2—source data 1. [file elife-69207-fig1-figsupp2-data1.xlsx]

## Sheet: fig1 sup 2A
TMRE				TMRE
GST	GJA1-20k			GST	GJA1-20k
733074	406090		Mean	1.10531e+06	1.12938e+06
577322	2513756		SD	621182	735111
612080	1015275		N	39	41
679480	648455		p-value vs GST	-----	0.875
1870029	1188053		Test	Mann-Whitney
1405251	1984125
1838953	1074421
1645015	1362922		Table Analyzed			TMRE intensity(CTCF)
375472	1039188
913341	572344		Column B			GJA1-20k
882529	519506		vs.			vs.
381008	575422		Column A			GST
2955310	917152
2279362	1308154		Mann Whitney test
637893	2700151		P value			0.875
731130	380131		Exact or approximate P value?			ns
1905656	420983		P value summary			No
927959	687193		Significantly different (P < 0.05)?			Two-tailed
658761	1173113		One- or two-tailed P value?			t=0.1578, df=78
428387	580154		Sum of ranks in column A,B
851996	1104411		Mann-Whitney U
835397	1135758					1105313
826561	968913		Difference between medians			1129382
286695	1861166		Median of column A			24069 ± 152545
964796	1854279		Median of column B			-279625 to 327763
662842	2016040		Difference: Actual			0.0003191
1838399	1292772		Difference: Hodges-Lehmann
746397	720142
1092723	3299333				GST	GJA1-20k
617047	860348		Number of values		39	41
586058	340410
589534	74470.8		Minimum		286695	74471
2044401	300118		25% Percentile		637893	573883
1270936	580264		Median		882529	973346
1438826	544085		75% Percentile		1645015	1527987
1822858	1812847		Maximum		2955310	3299333
940427	845589
1762527	484338		Mean		1105313	1129382
1490762	973346		Std. Deviation		621182	735111
	2476388		Std. Error of Mean		99469	114805
	1693052
			Lower 95% CI		903949	897352
			Upper 95% CI		1306677	1361412
			Mean ranks		41.33	40.57

## Sheet: fig1 sup 2B
ATP				ATP
GST	GJA1-20k			GST	GJA1-20k
2204.67	3307.4		Mean	1972.34	2109.94
2804.7	1307.3		SD	677.217	769.704
1885.8	1850.1		N	10	10
1546.8	1602.87		p-value vs GST	-----	0.7394
1861.4	1128.3		Test	Mann-Whitney
1317.4	1987.6
1384.4	1672.1
1103.3	2180.8		Table Analyzed			ATP(uM/mg)
2450.2	2864.8
3164.7	3198.1		Column B			GJA1-20k
			vs.			vs.
			Column A			GST
			Mann Whitney test
			P value			0.7394
			Exact or approximate P value?			Exact
			P value summary			ns
			Significantly different (P < 0.05)?			No
			One- or two-tailed P value?			Two-tailed
			Sum of ranks in column A,B			100 , 110
			Mann-Whitney U			45
			Difference between medians
			Median of column A			1874, n=10
			Median of column B			1919, n=10
			Difference: Actual			45.25
			Difference: Hodges-Lehmann			113.6
					GST	GJA1-20k
			Number of values		10	10
			Minimum		1103	1128
			25% Percentile		1368	1529
			Median		1874	1919
			75% Percentile		2539	2948
			Maximum		3165	3307
			Mean		1972	2110
			Std. Deviation		677.2	769.7
			Std. Error of Mean		214.2	243.4
			Lower 95% CI		1488	1559
			Upper 95% CI		2457	2661
			Mean ranks		10	11

## Sheet: fig1 sup 2C
mtDNA copy #				mtDNA copy #				mtDNA copy #				mtDNA copy #				mtDNA copy #				mtDNA copy #
GST	GJA1-20k			GST	GJA1-20k			WT	M213L			WT	M213L			WT+GST	WT+GJA1-20k			WT+GST	WT+GJA1-20k
0.954681	0.876693		Mean	1	1.0204			0.97	0.79		Mean	1.002	0.845			1.12	1.64		Mean	0.999	1.355
0.990645	1.18782		SD	0.0528292	0.110595			1.02	0.78		SD	0.0544977	0.0828855			0.74	1.68		SD	0.31303	0.304239
1.03832	1.00892		N	5	5			0.97	0.96		N	5	6			0.65	1.21		N	10	10
1.06908	1.01864		p-value vs GST	-----	0.8413			0.96	0.78		p-value vs WT	-----	0.0065			1.04	1.2		p-value vs WT+GST	-----	0.0185
0.947265	1.00995		Test	Mann-Whitney				1.09	0.94		Test	Mann-Whitney				1.46	1.39		Test	Mann-Whitney
									0.82							1.23	1.81
																1.08	1.15
			Table Analyzed			HEK mtDNA					Table Analyzed			young heart mtDNA		0.71	1.48		Table Analyzed			adult heart mtDNA
																1.38	0.8
			Column B			GJA1-20k					Column B			M213L		0.58	1.19		Column B			WT+GJA1-20k
			vs.			vs.					vs.			vs.					vs.			vs.
			Column A			GST					Column A			WT					Column A			WT+GST
			Mann Whitney test								Mann Whitney test								Mann Whitney test
			P value			0.8413					P value			0.0065					P value			0.0185
			Exact or approximate P value?			Exact					Exact or approximate P value?			Exact					Exact or approximate P value?			Exact
			P value summary			ns					P value summary			**					P value summary			*
			Significantly different (P < 0.05)?			No					Significantly different (P < 0.05)?			Yes					Significantly different (P < 0.05)?			Yes
			One- or two-tailed P value?			Two-tailed					One- or two-tailed P value?			Two-tailed					One- or two-tailed P value?			Two-tailed
			Sum of ranks in column A,B			26 , 29					Sum of ranks in column A,B			44.50 , 21.50					Sum of ranks in column A,B			74 , 136
			Mann-Whitney U			11					Mann-Whitney U			0.5					Mann-Whitney U			19
			Difference between medians								Difference between medians								Difference between medians
			Median of column A			0.9906, n=5					Median of column A			0.9700, n=5					Median of column A			1.060, n=10
			Median of column B			1.010, n=5					Median of column B			0.8050, n=6					Median of column B			1.300, n=10
			Difference: Actual			0.0193					Difference: Actual			-0.165					Difference: Actual			0.24
			Difference: Hodges-Lehmann			0.0193					Difference: Hodges-Lehmann			-0.18					Difference: Hodges-Lehmann			0.405
					GST	GJA1-20k							WT	M213L							WT+GST	WT+GJA1-20k
			Number of values		5	5					Number of values		5	6					Number of values		10	10
			Minimum		0.9473	0.8767					Minimum		0.96	0.78					Minimum		0.58	0.8
			25% Percentile		0.951	0.9428					25% Percentile		0.965	0.78					25% Percentile		0.695	1.18
			Median		0.9906	1.01					Median		0.97	0.805					Median		1.06	1.3
			75% Percentile		1.054	1.103					75% Percentile		1.055	0.945					75% Percentile		1.268	1.65
			Maximum		1.069	1.188					Maximum		1.09	0.96					Maximum		1.46	1.81
			Mean		1	1.02					Mean		1.002	0.845					Mean		0.999	1.355
			Std. Deviation		0.05283	0.1106					Std. Deviation		0.0545	0.08289					Std. Deviation		0.313	0.3042
			Std. Error of Mean		0.02363	0.04946					Std. Error of Mean		0.02437	0.03384					Std. Error of Mean		0.09899	0.09621
			Lower 95% CI		0.9344	0.8831					Lower 95% CI		0.9343	0.758					Lower 95% CI		0.7751	1.137
			Upper 95% CI		1.066	1.158					Upper 95% CI		1.07	0.932					Upper 95% CI		1.223	1.573
			Mean ranks		5.2	5.8					Mean ranks		8.9	3.583					Mean ranks		7.4	13.6

## Sheet: fig1 sup 2E
PGC-1a		mtTFA		LC3ii/i					PGC-1a		mtTFA		LC3ii/i
GST	GJA1-20k	GST	GJA1-20k	GST	GJA1-20k				GST	GJA1-20k	GST	GJA1-20k	GST	GJA1-20k
0.73888	0.969245	0.474463	0.734998	0.774131	1.03616			Mean	1	1.08791	1	0.849706	1	1.1354
0.982769	0.988212	1.10661	1.22614	0.877034	0.885519			SD	0.295916	0.156917	0.321445	0.245836	0.191583	0.192327
1.13086	1.35751	1.07667	0.886414	1.00918	1.28222			N	5	5	5	5	5	5
1.42997	1.04692	1.34621	0.843665	1.27686	1.36626			p-value vs GST	-----	0.6905	-----	0.4206	-----	0.2222
0.717528	1.07765	0.996054	0.557311	1.0628	1.10685			Test	Mann-Whitney		Mann-Whitney		Mann-Whitney
									Table Analyzed			PGC		mtTFA		LC3ii/i
									Column B			GJA1-20k		GJA1-20k		20k
									vs.			vs.		vs.		vs.
									Column A			GST		GST		GST
									Mann Whitney test
									P value			0.6905		0.4206		0.2222
									Exact or approximate P value?			Exact		Exact		Exact
									P value summary			ns		ns		ns
									Significantly different (P < 0.05)?			No		No		No
									One- or two-tailed P value?			Two-tailed		Two-tailed		Two-tailed
									Sum of ranks in column A,B			25 , 30		32 , 23		21 , 34
									Mann-Whitney U			10		8		6
									Difference between medians
									Median of column A			0.9828, n=5		1.077, n=5		1.009, n=5
									Median of column B			1.047, n=5		0.8437, n=5		1.107, n=5
									Difference: Actual			0.06415		-0.233		0.09767
									Difference: Hodges-Lehmann			0.09488		-0.2202		0.1114
												GST	GJA1-20k	GST	GJA1-20k	GST	GJA1-20k
										Number of values		5	5	5	5	5	5
										Minimum		0.7175	0.9692	0.4745	0.5573	0.7741	0.8855
										25% Percentile		0.7282	0.9787	0.7353	0.6462	0.8256	0.9608
										Median		0.9828	1.047	1.077	0.8437	1.009	1.107
										75% Percentile		1.28	1.218	1.226	1.056	1.17	1.324
										Maximum		1.43	1.358	1.346	1.226	1.277	1.366
										Mean		1	1.088	1	0.8497	1	1.135
										Std. Deviation		0.2959	0.1569	0.3214	0.2458	0.1916	0.1923
										Std. Error of Mean		0.1323	0.07018	0.1438	0.1099	0.08568	0.08601
										Lower 95% CI		0.6326	0.8931	0.6009	0.5445	0.7621	0.8966
										Upper 95% CI		1.367	1.283	1.399	1.155	1.238	1.374
										Mean ranks		5	6	6.4	4.6	4.2	6.8

## Sheet: fig1 sup 2G
PGC-1a		mtTFA		LC3ii/i					PGC-1a		mtTFA		LC3ii/i
WT	M213L	WT	M213L	WT	M213L				WT	M213L	WT	M213L	WT	M213L
0.579382	0.685986	0.764889	0.924641	0.814793	0.86728			Mean	1	0.699477	1	0.97424	1	1.07259
0.51749	0.791947	0.753213	0.747871	1.37203	1.3256			SD	0.571739	0.363799	0.321359	0.146191	0.339323	0.431377
1.04568	0.238935	0.787658	1.12253	1.18522	1.52359			N	5	5	5	5	4	4
1.94259	1.2336	1.42071	1.06675	0.627964	0.573897			p-value vs WT	-----	0.5476	-----	>0.9999	-----	0.8857
0.914856	0.546913	1.27353	1.00941					Test	Mann-Whitney		Mann-Whitney		Mann-Whitney
									Table Analyzed			PGC1a		mtTFA		LC3ii/i
									Column B			KO		KO		KO
									vs.			vs.		vs.		vs.
									Column A			WT		WT		WT
									Mann Whitney test
									P value			0.5476		>0.9999		0.8857
									Exact or approximate P value?			Exact		Exact		Exact
									P value summary			ns		ns		ns
									Significantly different (P < 0.05)?			No		No		No
									One- or two-tailed P value?			Two-tailed		Two-tailed		Two-tailed
									Sum of ranks in column A,B			31 , 24		28 , 27		17 , 19
									Mann-Whitney U			9		12		7
									Difference between medians
									Median of column A			0.9149, n=5		0.7877, n=5		1.000, n=4
									Median of column B			0.6860, n=5		1.009, n=5		1.096, n=4
									Difference: Actual			-0.2289		0.2218		0.09644
									Difference: Hodges-Lehmann			-0.2537		-0.005342		0.09644
												WT	KO	WT	KO	WT	KO
										Number of values		5	5	5	5	4	4
										Minimum		0.5175	0.2389	0.7532	0.7479	0.628	0.5739
										25% Percentile		0.5484	0.3929	0.7591	0.8363	0.6747	0.6472
										Median		0.9149	0.686	0.7877	1.009	1	1.096
										75% Percentile		1.494	1.013	1.347	1.095	1.325	1.474
										Maximum		1.943	1.234	1.421	1.123	1.372	1.524
										Mean		1	0.6995	1	0.9742	1	1.073
										Std. Deviation		0.5717	0.3638	0.3214	0.1462	0.3393	0.4314
										Std. Error of Mean		0.2557	0.1627	0.1437	0.06538	0.1697	0.2157
										Lower 95% CI		0.2901	0.2478	0.601	0.7927	0.4601	0.3862
										Upper 95% CI		1.71	1.151	1.399	1.156	1.54	1.759
										Mean ranks		6.2	4.8	5.6	5.4	4.25	4.75
