# Supplementary material for: Protective mitochondrial fission induced by stress-responsive protein GJA1-20k
Source: eLife. 2021 Oct 5;10:e69207. doi: 10.7554/eLife.69207 (PMC8492060; doi:10.7554/eLife.69207)
Supplement: Figure 1—source data 1. [file elife-69207-fig1-data1.xlsx]

## Sheet: Fig. 1F
HEK293											Neonatal Cardiomyocyte												young heart									adult heart
GST	GJA1-20k	Control	siGja1			GST	GJA1-20k	Control	siGja1		WT	GJA1-20k	M213L			WT	GJA1-20k	M213L					WT	M213L			WT	M213L				GST	GJA1-20k			WT	GJA1-20k
1.83534	0.697816	1.00251	1.06137		Mean	1	0.464174	1	1.19673		1.04119	0.793993	0.88209		Mean	1	0.676527	1.30648					1.14838	1.57536		Mean	1	1.81198				0.854399	0.293711		Mean	1	0.542087
0.764322	0.334165	0.812542	1.21172		SD	0.251056	0.128451	0.238537	0.255927		0.924368	0.708751	1.20582		SEM	0.0401554	0.0360241	0.0569008					0.871523	1.53002		SEM	0.0252853	0.0563153				0.846651	0.449413		SEM	0.0902292	0.0195179
1.09452	0.775991	1.47785	1.16685		N	51	67	52	57		1.18888	1.39398	2.16896		N	46	47	48					0.847587	1.77503		N	84	91				0.905676	0.488151		N	25	28
0.809829	0.711335	0.949283	1.16859		p-value vs GST	-----	<0.0001				0.765157	1.0258	0.792909		p-value vs WT	-----	<0.0001	0.0064					1.41008	1.98347		p-value vs WT	-----	<0.0001				1.08626	0.600041		p-value vs WT	-----	<0.0001
1.17092	0.254357	1.12688	0.880127		Test	Mann-Whitney					1.06576	0.554997	0.857663		p-value vs GJA1-20k	-----	-----	<0.0001					0.951403	1.39174		Test	Mann-Whitney					0.976453	0.572343		Test	Mann-Whitney
0.69039	0.466117	1.36758	1.61218				p-value v. Control	-----	<0.0001		1.10132	0.304184	0.881873		Test	Dunn's multiple comarisons							0.689079	1.18969								0.725747	0.556786
1.34836	0.786219	1.36099	1.54718				Test	Mann-Whitney			0.680927	0.757533	1.17442										0.814181	1.6625								0.731565	0.387209
1.07632	0.475855	1.64045	1.20204								0.552142	0.752691	0.734443										1.49711	1.35595								0.806392	0.451051
1.03407	0.357966	0.743358	1.2261								0.563272	0.644575	0.935714										1.12228	1.62159								0.532646	0.500607
1.53776	0.392457	1.22638	1.25457								0.437016	1.27705	1.16831										0.869352	2.50639								0.430043	0.615612
0.853242	0.399339	0.445364	0.845605		Table Analyzed			HEK(GSTvs20k)			0.538627	1.22631	1.60876		Table Analyzed			Neo CM					1.85767	1.49528		Table Analyzed			young heart			0.622852	0.540612		Table Analyzed			adult heart
0.624944	0.32206	0.798436	1.07809								0.683565	0.436763	0.798221										1.1541	1.77634								0.72583	0.655099
1.07482	0.403527	0.965493	1.08473		Column B			GJA1-20k			0.6694	0.72241	1.89275		Kruskal-Wallis test								0.802877	1.39947		Column B			M213L			0.724803	0.470376		Column B			GJA1-20k
0.902857	0.402385	0.964904	1.23732		vs.			vs.			1.3044	0.62134	1.2489		P value			<0.0001					1.40203	2.70752		vs.			vs.			1.34296	0.608447		vs.			vs.
1.5655	0.422079	0.877519	1.05274		Column A			GST			0.663365	0.752149	1.13756		Exact or approximate P value?			Approximate					1.05536	1.17662		Column A			WT			1.33745	0.513048		Column A			GST
1.10608	0.52683	0.925081	1.34837								1.11881	0.947278	0.726132		P value summary			****					1.00279	1.26575								0.852364	0.506972
0.890236	0.335362	1.00282	0.990059		Mann Whitney test						1.37345	0.799088	0.840969		Do the medians vary signif. (P < 0.05)?			Yes					1.35266	1.69421		Mann Whitney test						0.998668	0.544287		Mann Whitney test
0.879301	0.374205	1.19427	1.52143		P value			<0.0001			1.15971	0.601105	0.953565		Number of groups			3					1.47385	1.88912		P value			<0.0001			0.772258	0.768829		P value			<0.0001
0.94102	0.431871	0.890083	0.952985		Exact or approximate P value?			Exact			1.64353	0.333164	1.06981		Kruskal-Wallis statistic			59.78					0.719457	1.36824		Exact or approximate P value?			Exact			0.91577	0.549998		Exact or approximate P value?			Exact
1.10711	0.401079	0.918687	1.55245		P value summary			****			0.783731	0.41884	1.4312										0.681195	1.56001		P value summary			****			0.684325	0.515576		P value summary			****
0.910256	0.354049	0.893055	0.854888		Significantly different (P < 0.05)?			Yes			1.13796	0.74008	1.75128		Data summary								0.735755	1.45428		Significantly different (P < 0.05)?			Yes			0.622189	0.472401		Significantly different (P < 0.05)?			Yes
0.597988	0.593391	1.23979	0.937028		One- or two-tailed P value?			Two-tailed			0.725626	0.576641	1.0443		Number of treatments (columns)			3					1.03185	1.04936		One- or two-tailed P value?			Two-tailed			1.60828	0.64948		One- or two-tailed P value?			Two-tailed
0.898369	0.382991	0.975644	0.701993		Sum of ranks in column A,B			4694 , 2328			0.847401	0.454216	1.36283		Number of values (total)			141					0.833758	1.21553		Sum of ranks in column A,B			3948 , 11453			1.83275	0.649279		Sum of ranks in column A,B			962.5 , 468.5
0.634655	0.346378	0.881053	1.29787		Mann-Whitney U			49.5			1.09384	0.359687	1.92834										0.772973	1.40255		Mann-Whitney U			377.5			1.86671	0.432098		Mann-Whitney U			62.5
0.939334	0.572256	0.63895	1.37782								0.918623	0.858747	1.67684		Number of families			1					0.848628	1.5878								2.19696	0.495546
0.907454	0.357721	0.981702	1.46187		Difference between medians						0.843534	0.474632	0.763712		Number of comparisons per family			3					1.1617	1.69176		Difference between medians							0.546575		Difference between medians
0.794597	0.488096	0.889438	1.27053		Median of column A			0.9400, n=51			1.28557	0.483883	1.70243		Alpha			0.05					1.01953	1.41384		Median of column A			0.9750, n=84				0.577062		Median of column A			0.8500, n=25
0.739216	0.399529	0.596576	1.55584		Median of column B			0.4300, n=67			1.28116	0.627953	0.795872										1.14532	0.962897		Median of column B			1.660, n=91				0.767815		Median of column B			0.5400, n=28
0.937892	0.276118	1.26483	1.06452		Difference: Actual			-0.51			0.803208	0.714821	1.70597		Dunn's multiple comparisons test		Mean rank diff.	Significant?	Summary	Adjusted P Value			1.06282	1.59965		Difference: Actual			0.685						Difference: Actual			-0.31
1.08192	0.278675	0.848466	0.876958		Difference: Hodges-Lehmann			-0.51			0.83497	0.930547	1.20134		WT vs. GJA1-20k		38.58	Yes	****	<0.0001	A-B		0.769398	1.51706		Difference: Hodges-Lehmann			0.73						Difference: Hodges-Lehmann			-0.32
1.02314	0.35209	1.09315	0.744928								0.938172	0.485943	1.95168		WT vs. M213L		-25.86	Yes	**	0.0064	A-C		1.17311	1.37972
0.841437	0.618253	0.921296	1.04146				GST	GJA1-20k			1.61064	0.879922	1.84548		GJA1-20k vs. M213L		-64.44	Yes	****	<0.0001	B-C		1.19112	1.63738				WT	M213L								GST	GJA1-20k
0.903183	0.415333	1.10826	1.07758		Number of values		51	67			0.933221	0.595323	1.43365										1.238	1.06612		Number of values		84	91						Number of values		25	28
1.28615	0.358755	0.913555	1.21923								0.985255	0.751535	0.763315		Test details	Mean rank 1	Mean rank 2	Mean rank diff.	n1	n2	Z		0.75432	1.5151
0.968956	0.527646	1.10868	1.16045		Minimum		0.6	0.25			1.12737	0.424116	1.37215		WT vs. GJA1-20k	75.05	36.48	38.58	46	47	4.554		0.974962	1.46054		Minimum		0.53	0.96						Minimum		0.43	0.29
1.01348	0.371349	0.58491	1.34173		25% Percentile		0.84	0.36			1.24192	0.778491	1.40337		WT vs. M213L	75.05	100.9	-25.86	46	48	3.069		1.0632	2.15314		25% Percentile		0.815	1.41						25% Percentile		0.725	0.475
0.91711	0.406166	1.19503	1.41759		Median		0.94	0.43			1.03451	0.365216	1.27314		GJA1-20k vs. M213L	36.48	100.9	-64.44	47	48	7.688		0.953945	1.56178		Median		0.975	1.66						Median		0.85	0.54
0.980625	0.558029	1.5594	1.71796		75% Percentile		1.11	0.54			0.99465	0.913383	1.6367										1.33321	1.83524		75% Percentile		1.13	2.11						75% Percentile		1.215	0.6075
0.769817	0.41623	0.925081	1.17655		Maximum		1.84	0.84			1.12203	0.385885	1.74875				WT	GJA1-20k	M213L				1.05051	1.41327		Maximum		1.86	3.6						Maximum		2.2	0.77
1.29542	0.490952	0.74246	0.986301								0.894231	0.465996	1.6651		Number of values		46	47	48				0.741021	1.80339
1.22418	0.347085	0.895607	1.25476		Mean		0.9998	0.4642			1.25565	0.488544	1.25815										1.28311	1.60169		Mean		0.9996	1.812						Mean		1	0.5429
1.18221	0.333594	1.13524	1.55576		Std. Deviation		0.2522	0.1291			0.98764	0.583146	1.45078		Minimum		0.44	0.3	0.73				1.07976	1.81128		Std. Deviation		0.2315	0.5373						Std. Deviation		0.452	0.1042
1.39838	0.351927	0.90775	1.28707		Std. Error of Mean		0.03531	0.01577			1.20517	0.542422	1.91815		25% Percentile		0.795	0.48	0.9425				0.903092	1.32914		Std. Error of Mean		0.02526	0.05632						Std. Error of Mean		0.09039	0.01969
0.995966	0.325107	1.00691	0.899562								1.36572	0.598937	1.02247		Median		1.01	0.63	1.265				1.04732	1.27778
0.911235	0.49038	0.940898	1.00296		Lower 95% CI		0.9289	0.4327			1.15097	0.983412	1.17908		75% Percentile		1.168	0.79	1.663				0.941164	2.6534		Lower 95% CI		0.9494	1.7						Lower 95% CI		0.8138	0.5025
0.822206	0.423139	1.1056	1.069		Upper 95% CI		1.071	0.4957			1.12232	0.525149	1.51348		Maximum		1.64	1.39	2.17				0.689094	2.10592		Upper 95% CI		1.05	1.924						Upper 95% CI		1.187	0.5833
0.63596	0.50137	1.03869	1.16578									0.736141	1.5662										0.864768	3.29554
0.830774	0.538635	1.34448	2.06484		Mean ranks		92.03	34.74					1.26631		Mean		0.9996	0.6764	1.306				1.21773	1.50808		Mean ranks		46.99	125.9						Mean ranks		38.5	16.73
0.889066	0.405649	1.04713	1.33183												Std. Deviation		0.2725	0.2471	0.3948				0.978457	2.14407
1.29899	0.490788	0.91751	0.979655												Std. Error of Mean		0.04018	0.03604	0.05699				0.952728	1.56634
1.0631	0.517772	0.710686	1.186																				0.525671	1.65172
	0.444111	0.897655	0.924913		Table Analyzed			HEK(Cont vs siGja1)							Lower 95% CI		0.9186	0.6038	1.192				0.921522	1.96981
	0.311071		1.08928												Upper 95% CI		1.08	0.7489	1.421				1.31097	1.39382
	0.354511		1.04486		Column B			siGja1															0.788089	1.85182
	0.701705		1.34484		vs.			vs.							Mean ranks		75.05	36.48	100.9				0.910209	1.64331
	0.549679		1.36369		Column A			Control															1.12273	1.90565
	0.582701		1.3714																				0.920896	2.61902
	0.463805				Mann Whitney test																		0.9175	2.62268
	0.835317				P value			<0.0001															1.14498	2.64901
	0.562626				Exact or approximate P value?			Exact															1.0049	3.59891
	0.452571				P value summary			****															1.24859	2.66803
	0.554629				Significantly different (P < 0.05)?			Yes															1.1263	3.13415
	0.529441				One- or two-tailed P value?			Two-tailed															0.894968	2.40961
	0.472999				Sum of ranks in column A,B			2212 , 3784															0.756365	1.78688
	0.506021				Mann-Whitney U			833.5															0.915671	2.1089
	0.666616																						0.848119	2.92291
	0.55142				Difference between medians																		1.02663	2.47026
					Median of column A			0.9550, n=52															1.01748	2.27894
					Median of column B			1.180, n=57															0.766472	2.47026
					Difference: Actual			0.225															0.785976	2.28954
					Difference: Hodges-Lehmann			0.19															0.800928	1.6508
																							0.725516	2.03357
							Control	siGja1															1.0849	1.5481
					Number of values		52	57															1.13443	2.11762
																							0.984288	2.22218
					Minimum		0.45	0.7															0.765595	1.85266
					25% Percentile		0.89	1.02															0.995633	1.06487
					Median		0.955	1.18															0.741898	1.06918
					75% Percentile		1.125	1.345															1.05865	1.2022
					Maximum		1.64	2.06															0.785245	1.12908
																							0.873933	1.28404
					Mean		1.001	1.196															0.952447	1.28252
					Std. Deviation		0.2385	0.2561															1.60667	1.65159
					Std. Error of Mean		0.03307	0.03392															1.00051	1.97385
																								2.62707
					Lower 95% CI		0.9342	1.129																2.01857
					Upper 95% CI		1.067	1.264																1.93926
																								1.71014
					Mean ranks		42.53	66.38																2.35542
																								2.02355
																								1.75102
