# Supplementary material for: Protective mitochondrial fission induced by stress-responsive protein GJA1-20k
Source: eLife. 2021 Oct 5;10:e69207. doi: 10.7554/eLife.69207 (PMC8492060; doi:10.7554/eLife.69207)
Supplement: Figure 2—figure supplement 1—source data 1. [file elife-69207-fig2-figsupp1-data1.xlsx]

## Sheet: fig2 sup 1C
HEK293							HEK293
GST		GJA1-20k					GST		GJA1-20k
Control	siDRP1	Control	siDRP1				Control	siDRP1	Control	siDRP1
34.2	8.1	44.3	4.3			Mean	31.9529	7.85	29.5313	8.04839
53.8	12.8	22.4	10.6			SD	11.7797	3.5197	11.3658	2.49077
17.5	8.8	13.8	6.7			N	34	36	32	31
23.7	3.5	15.3	9.4			p-value vs Control	-----	<0.0001	-----	<0.0001
21.4	3.4	21.2	6.2			Test	Bonferroni's multiple comparisons
48.4	8.7	43.8	10.8
29	13.4	20.4	9.5
35.6	5.9	15.5	7.8
21.7	16.2	15.7	5.4
28.8	9.1	29.9	7.3
36.2	4.5	22.4	6.2			Table Analyzed			%mito area with DRP1						Compare each cell mean with the other cell mean in that row
32.4	6.2	32.4	13.8
32.3	3.2	21.8	10.5			Two-way ANOVA			Ordinary						Number of families			1
46.9	7.1	30.9	6.4			Alpha			0.05						Number of comparisons per family			2
11.7	8.6	13.6	8.1												Alpha			0.05
55.7	13	54.3	9.6			Source of Variation			% of total variation	P value	P value summary	Significant?
24.7	6.1	18.1	10.2			Interaction			0.2135	0.3736	ns	No			Bonferroni's multiple comparisons test			Predicted (LS) mean diff.	95.00% CI of diff.	Below threshold?	Summary	Adjusted P Value
39.3	9	31.5	9.8			Row Factor			0.1537	0.45	ns	No
18	9.2	37.4	3.8			Column Factor			64.63	<0.0001	****	Yes			si Control - siDRP1
22.9	12.2	23.7	10.8												GST			24.1	19.52 to 28.68	Yes	****	<0.0001
36.1	10	23	5.9			ANOVA table			SS (Type III)	DF	MS	F (DFn, DFd)	P value		GJA1-20k			21.48	16.66 to 26.31	Yes	****	<0.0001
33.4	7.1	18.7	6.9			Interaction			56.88	1	56.88	F (1, 129) = 0.7972	P=0.3736
36.5	11.1	45.2	5			Row Factor			40.95	1	40.95	F (1, 129) = 0.5740	P=0.4500
12.7	4.5	27.7	3.7			Column Factor			17217	1	17217	F (1, 129) = 241.3	P<0.0001		Test details			Predicted (LS) mean 1	Predicted (LS) mean 2	Predicted (LS) mean diff.	SE of diff.	N1	N2	t	DF
43.2	4.6	39.8	7			Residual			9203	129	71.34
24.8	5.8	23.5	8.4												DMSO - LatA
27.7	6.7	42.2	10			Difference between column means									GST			31.95	7.85	24.1	2.02	34	36	11.93	129
40.7	13.6	37	11.5			Predicted (LS) mean of DMSO			30.74						GJA1-20k			29.53	8.048	21.48	2.129	32	31	10.09	129
20.4	2.5	48.7	5.5			Predicted (LS) mean of LatA(100nM)			7.949
22.7	6.3	35.8	9.2			Difference between predicted means			22.79
26.2	11.1	40.8	9.2			SE of difference			1.467
42.2	5.9	34.2				95% CI of difference			19.89 to 25.70
57.4	2.8
28.2	6.8					Difference between row means
	11					Predicted (LS) mean of GST			19.9
	3.8					Predicted (LS) mean of GJA1-20k			18.79
						Difference between predicted means			1.112
						SE of difference			1.467
						95% CI of difference			-1.791 to 4.015
						Interaction CI
						Mean diff, A1 - B1			24.1
						Mean diff, A2 - B2			21.48
						(A1 -B1) - (A2 - B2)			2.62
						95% CI of difference			-3.186 to 8.426
						(B1 - A1) - (B2 - A2)			-2.62
						95% CI of difference			-8.426 to 3.186
						Data summary
						Number of columns (Column Factor)			2
						Number of rows (Row Factor)			2
						Number of values			133

## Sheet: fig2 sup 1E
HEK293						HEK293
GST		GJA1-20k				GST		GJA1-20k
DMSO	Mdivi-1	DMSO	Mdivi-1			DMSO	Mdivi-1	DMSO	Mdivi-1
1.0396	1.433	0.7093	0.6015		Mean	1	1.40148	0.670497	0.703238
1.0616	1.0675	0.7015	0.7529		SD	0.251079	0.313488	0.123221	0.180834
0.6192	1.192	0.6111	0.4123		N	32	29	33	29
0.8096	1.2165	0.8263	0.7054		p-value vs DMSO	-----	<0.0001	-----	>0.9999
0.993	0.8528	0.9108	0.5516		Test	Bonferroni's multiple comparisons
1.6608	1.6342	0.9537	1.3143
0.763	1.7453	0.7905	0.5967
0.7109	1.9754	0.7107	0.8664
1.0076	1.153	0.6389	1.0135			Table Analyzed			Average Area of Mitochondria						Compare each cell mean with the other cell mean in that row
1.5647	2.2931	0.6053	0.6381
0.8965	1.7632	0.4227	0.6074			Two-way ANOVA			Ordinary						Number of families			1
0.9128	1.4353	0.8565	0.5696			Alpha			0.05						Number of comparisons per family			2
0.9353	0.9329	0.6708	0.8022												Alpha			0.05
1.6179	1.1646	0.3643	0.8033			Source of Variation			% of total variation	P value	P value summary	Significant?
1.3712	1.3664	0.5546	0.6673			Interaction			6.345	<0.0001	****	Yes			Bonferroni's multiple comparisons test			Predicted (LS) mean diff.	95.00% CI of diff.	Significant?	Summary	Adjusted P Value
1.0309	1.363	0.5484	0.7286			Row Factor			49.29	<0.0001	****	Yes
0.8244	1.4583	0.7296	0.8979			Column Factor			8.798	<0.0001	****	Yes			DMSO - Mdivi-1
0.9328	1.3562	0.6601	0.6351												GST			-0.4015	-0.5333 to -0.2696	Yes	****	<0.0001
0.9837	1.3775	0.6649	0.694			ANOVA table			SS (Type III)	DF	MS	F (DFn, DFd)	P value		GJA1-20k			-0.03274	-0.1636 to 0.09816	No	ns	>0.9999
0.789	1.3874	0.575	0.8186			Interaction			1.042	1	1.042	F (1, 119) = 20.30	P<0.0001
1.1113	1.404	0.7224	0.7391			Row Factor			8.093	1	8.093	F (1, 119) = 157.7	P<0.0001
0.7644	1.3168	0.698	0.4009			Column Factor			1.445	1	1.445	F (1, 119) = 28.15	P<0.0001		Test details			Predicted (LS) mean 1	Predicted (LS) mean 2	Predicted (LS) mean diff.	SE of diff.	N1	N2	t	DF
0.9779	1.7006	0.7742	0.5372			Residual			6.107	119	0.05132
1.2164	1.2057	0.6742	0.6481												DMSO - Mdivi-1
0.9336	1.0355	0.6846	0.5985			Difference between column means									GST			1	1.401	-0.4015	0.05808	32	29	6.912	119
0.7406	1.466	0.524	0.7836			Predicted (LS) mean of DMSO			0.8352						GJA1-20k			0.6705	0.7032	-0.03274	0.05766	33	29	0.5678	119
0.8168	1.4607	0.6144	0.8214			Predicted (LS) mean of Mdivi-1			1.052
0.8949	1.1228	0.5565	0.6016			Difference between predicted means			-0.2171
1.0069	1.7632	0.6711	0.5868			SE of difference			0.04092
0.9053		0.6679				95% CI of difference			-0.2981 to -0.1361
1.0166		0.5921
1.0908		0.6874				Difference between row means
		0.7546				Predicted (LS) mean of GST			1.201
						Predicted (LS) mean of GJA1-20k			0.6869
						Difference between predicted means			0.5139
						SE of difference			0.04092
						95% CI of difference			0.4328 to 0.5949
						Interaction CI
						Mean diff, A1 - B1			-0.4015
						Mean diff, A2 - B2			-0.03274
						(A1 -B1) - (A2 - B2)			-0.3687
						95% CI of difference			-0.5308 to -0.2067
						(B1 - A1) - (B2 - A2)			0.3687
						95% CI of difference			0.2067 to 0.5308
						Data summary
						Number of columns (Column Factor)			2
						Number of rows (Row Factor)			2
						Number of values			123

## Sheet: fig2 sup 1I
HEK293								HEK293
GST			GJA1-20k					GST			GJA1-20k
Control	siDRP1	siDNM2	Control	siDRP1	siDNM2			Control	siDRP1	siDNM2	Control	siDRP1	siDNM2
0.815	0.701	0.967	0.685	0.87	0.451		Mean	0.999941	1.53997	1.17405	0.677656	0.821613	0.70103
0.602	0.648	0.73	0.663	0.774	0.451		SD	0.255782	0.553909	0.345797	0.127915	0.166205	0.131421
1.209	1.08	1.41	0.919	0.724	0.754		N	34	36	40	32	31	33
1.237	1.399	1.446	0.846	0.8	0.692		p-value vs Control	-----	<0.0001	0.0528	-----	0.2054	>0.9999
0.735	1.006	0.646	0.612	0.808	0.743		p-value vs siDRP1	-----	-----	<0.0001	-----	-----	0.3711
0.891	1.464	0.912	0.629	0.858	0.646		Test	Bonferroni's multiple comparisons
1.506	1.346	1.102	0.863	0.616	0.681
1.728	1.979	1.446	0.536	0.837	0.76
0.782	1.915	1.023	0.713	0.971	0.791			Table Analyzed	Ave Area of Mitochondria								Within each row, compare columns (simple effects within rows)
0.867	1.026	0.898	0.589	0.696	0.588
0.908	1.184	2.002	0.874	0.634	0.619			Two-way ANOVA			Ordinary						Number of families			2
0.754	2.344	1.708	0.521	0.927	0.582			Alpha			0.05						Number of comparisons per family			3
1.226	2.052	1.289	0.534	0.88	0.589												Alpha			0.05
0.895	1.839	1.132	0.472	0.577	0.579			Source of Variation			% of total variation	P value	P value summary	Significant?
1.199	1.231	1.143	0.475	0.719	0.812			Interaction			3.454	0.0014	**	Yes			Bonferroni's multiple comparisons test			Predicted (LS) mean diff.	95.00% CI of diff.	Below threshold?	Summary	Adjusted P Value
0.831	0.684	1.194	0.627	0.984	0.814			Row Factor			33.89	<0.0001	****	Yes
1.053	1.241	0.842	0.781	0.828	0.603			Column Factor			10.74	<0.0001	****	Yes			GST
0.668	1.423	1.076	0.557	1.021	0.908												siControl vs. siDRP1			-0.54	-0.7201 to -0.3600	Yes	****	<0.0001
1.338	1.482	1.215	0.549	0.852	1.003			ANOVA table			SS (Type III)	DF	MS	F (DFn, DFd)	P value		siControl vs. siDNM2			-0.1741	-0.3497 to 0.001512	No	ns	0.0528
0.871	0.951	0.622	0.71	1.196	0.525			Interaction			1.327	2	0.6635	F (2, 200) = 6.823	P=0.0014		siDRP1 vs. siDNM2			0.3659	0.1930 to 0.5389	Yes	****	<0.0001
1.13	1.889	1.29	0.668	0.75	0.927			Row Factor			13.02	1	13.02	F (1, 200) = 133.9	P<0.0001
0.937	2.109	1.147	0.79	0.628	0.645			Column Factor			4.126	2	2.063	F (2, 200) = 21.22	P<0.0001		20k
1.104	1.394	0.826	0.546	0.873	0.688			Residual			19.45	200	0.09725				siControl vs. siDRP1			-0.144	-0.3337 to 0.04578	No	ns	0.2054
1.139	2.149	0.712	0.806	0.568	0.74												siControl vs. siDNM2			-0.02337	-0.2102 to 0.1634	No	ns	>0.9999
0.897	2.175	1.074	0.811	0.775	0.677			Difference between row means									siDRP1 vs. siDNM2			0.1206	-0.06773 to 0.3089	No	ns	0.3711
1.03	2.81	1.218	0.762	0.862	0.895			Predicted (LS) mean of GST			1.238
0.959	2.718	1.258	0.814	0.707	0.683			Predicted (LS) mean of 20k			0.7334
0.854	0.93	1.03	0.778	1.062	0.736			Difference between predicted means			0.5046						Test details			Predicted (LS) mean 1	Predicted (LS) mean 2	Predicted (LS) mean diff.	SE of diff.	N1	N2	t	DF
1.035	1.427	0.974	0.638	0.846	0.577			SE of difference			0.04361
1.49	1.499	0.529	0.713	1.232	0.795			95% CI of difference			0.4186 to 0.5905						GST
0.756	1.882	1.52	0.494	0.595	0.733												siControl vs. siDRP1			0.9999	1.54	-0.54	0.07458	34	36	7.241	200
0.893	1.509	1.104	0.71		0.611			Data summary									siControl vs. siDNM2			0.9999	1.174	-0.1741	0.07274	34	40	2.394	200
0.699	0.932	1.212			0.836			Number of columns (Column Factor)			3						siDRP1 vs. siDNM2			1.54	1.174	0.3659	0.07164	36	40	5.108	200
0.96	1.75	1.033						Number of rows (Row Factor)			2
	1.137	1.807						Number of values			206						20k
	2.134	1.379															siControl vs. siDRP1			0.6777	0.8216	-0.144	0.07859	32	31	1.832	200
		1.126															siControl vs. siDNM2			0.6777	0.701	-0.02337	0.07737	32	33	0.3021	200
		1.229															siDRP1 vs. siDNM2			0.8216	0.701	0.1206	0.078	31	33	1.546	200
		1.931
		1.76
