# Supplementary material for: Protective mitochondrial fission induced by stress-responsive protein GJA1-20k
Source: eLife. 2021 Oct 5;10:e69207. doi: 10.7554/eLife.69207 (PMC8492060; doi:10.7554/eLife.69207)
Supplement: Figure 2—source data 1. [file elife-69207-fig2-data1.xlsx]

## Sheet: Fig. 2B
DRP1		p-DRP1(S616)		p-DRP1(S637)		MFN1		MFN2		Tom20		Normalized by Tubulin			DRP1		p-DRP1(S616)		p-DRP1(S637)		MFN1		MFN2		Tom20
GST	GJA1-20k	GST	GJA1-20k	GST	GJA1-20k	GST	GJA1-20k	GST	GJA1-20k	GST	GJA1-20k				GST	GJA1-20k	GST	GJA1-20k	GST	GJA1-20k	GST	GJA1-20k	GST	GJA1-20k	GST	GJA1-20k
0.890036	1.04878	0.756624	0.969816	1.32828	1.31878	0.97364	0.957436	0.880572	1.02902	0.851519	1.11333			Mean	1	0.999813	1	1.00082	1	1.0256	1	0.94376	1	1.02381	1	0.917767
1.14298	1.20342	1.12427	1.25052	1.19964	1.13855	0.911486	0.912036	1.20941	1.24118	1.09158	0.974941			SD	0.195332	0.169459	0.24593	0.1958	0.257171	0.210292	0.0908228	0.119831	0.184631	0.13287	0.156511	0.132864
1.10506	1.0383	1.31215	1.13455	0.944898	0.97107	0.973127	0.856581	1.10278	1.00756	0.963163	0.8831			N	5	5	5	5	5	5	5	5	5	5	5	5
1.15403	0.970849	1.06345	0.895464	0.73113	0.767959	1.15363	1.14319	1.06031	0.890729	1.22265	0.854113			p-value vs GST	-----	>0.9999	-----	>0.9999	-----	>0.9999	-----	0.2222	-----	>0.9999	-----	0.6905
0.707902	0.737719	0.743506	0.753727	0.796051	0.931646	0.988117	0.849559	0.746938	0.950561	0.871085	0.763353			Test	Mann-Whitney		Mann-Whitney		Mann-Whitney		Mann-Whitney		Mann-Whitney		Mann-Whitney
										p-DRP1/DRP1					p-DRP1/DRP1
										GST	GJA1-20k				GST	GJA1-20k
										0.851305	0.926016			Mean	1	1.00153
										0.985019	1.04061			SD	0.129156	0.07476
										1.18908	1.09424			N	5	5
										0.922816	0.923654			p-value vs GST	-----	0.8413
										1.05178	1.02314			Test	Mann-Whitney
	Table Analyzed			DRP1		p-DRP1(S616)		p-DRP1(S637)		MFN1		MFN2		Tom20		p-DRP1/total DRP1
	Column B			GJA1-20k		GJA1-20k		GJA1-20k		GJA1-20k		GJA1-20k		GJA1-20k		GJA1-20k
	vs.			vs.		vs.		vs.		vs.		vs.		vs.		vs.
	Column A			GST		GST		GST		GST		GST		GST		GST
	Mann Whitney test
	P value			>0.9999		>0.9999		>0.9999		0.2222		>0.9999		0.6905		0.8413
	Exact or approximate P value?			Exact		Exact		Exact		Exact		Exact		Exact		Exact
	P value summary			ns		ns		ns		ns		ns		ns		ns
	Significantly different (P < 0.05)?			No		No		No		No		No		No		No
	One- or two-tailed P value?			Two-tailed		Two-tailed		Two-tailed		Two-tailed		Two-tailed		Two-tailed		Two-tailed
	Sum of ranks in column A,B			28 , 27		27 , 28		27 , 28		34 , 21		27 , 28		30 , 25		26 , 29
	Mann-Whitney U			12		12		12		6		12		10		11
	Difference between medians
	Median of column A			1.105, n=5		1.063, n=5		0.9449, n=5		0.9736, n=5		1.060, n=5		0.9632, n=5		0.9850, n=5
	Median of column B			1.038, n=5		0.9698, n=5		0.9711, n=5		0.9120, n=5		1.008, n=5		0.8831, n=5		1.023, n=5
	Difference: Actual			-0.06675		-0.09364		0.0262		-0.0616		-0.05275		-0.08006		0.03812
	Difference: Hodges-Lehmann			-0.05628		0.01022		0.0262		-0.0616		0.01016		-0.08817		0.0032
				GST	GJA1-20k	GST	GJA1-20k	GST	GJA1-20k	GST	GJA1-20k	GST	GJA1-20k	GST	GJA1-20k	GST	GJA1-20k
		Number of values		5	5	5	5	5	5	5	5	5	5	5	5	5	5
		Minimum		0.7079	0.7377	0.7435	0.7537	0.7311	0.768	0.9115	0.8496	0.7469	0.8907	0.8515	0.7634	0.8513	0.9237
		25% Percentile		0.799	0.8543	0.7501	0.8246	0.7636	0.8498	0.9423	0.8531	0.8138	0.9206	0.8613	0.8087	0.8871	0.9248
		Median		1.105	1.038	1.063	0.9698	0.9449	0.9711	0.9736	0.912	1.06	1.008	0.9632	0.8831	0.985	1.023
		75% Percentile		1.149	1.126	1.218	1.193	1.264	1.229	1.071	1.05	1.156	1.135	1.157	1.044	1.12	1.067
		Maximum		1.154	1.203	1.312	1.251	1.328	1.319	1.154	1.143	1.209	1.241	1.223	1.113	1.189	1.094
		Mean		1	0.9998	1	1.001	1	1.026	1	0.9438	1	1.024	1	0.9178	1	1.002
		Std. Deviation		0.1953	0.1695	0.2459	0.1958	0.2572	0.2103	0.09082	0.1198	0.1846	0.1329	0.1565	0.1329	0.1292	0.07476
		Std. Error of Mean		0.08735	0.07578	0.11	0.08756	0.115	0.09405	0.04062	0.05359	0.08257	0.05942	0.06999	0.05942	0.05776	0.03343
		Lower 95% CI		0.7575	0.7894	0.6946	0.7577	0.6807	0.7645	0.8872	0.795	0.7707	0.8588	0.8057	0.7528	0.8396	0.9087
		Upper 95% CI		1.243	1.21	1.305	1.244	1.319	1.287	1.113	1.093	1.229	1.189	1.194	1.083	1.16	1.094
		Mean ranks		5.6	5.4	5.4	5.6	5.4	5.6	6.8	4.2	5.4	5.6	6	5	5.2	5.8

## Sheet: Fig. 2D
HEK293								HEK293
GST			GJA1-20k					GST			GJA1-20k
Control	siDRP1	K38A	Control	siDRP1	K38A			Control	siDRP1	K38A	Control	siDRP1	K38A
0.815	0.701	3.617	0.685	0.87	1.227		Mean	0.999941	1.53997	3.09197	0.677656	0.821613	0.695833
0.602	0.648	2.818	0.663	0.774	1.085		SD	0.255782	0.553909	1.11307	0.127915	0.166205	0.181622
1.209	1.08	3.689	0.919	0.724	0.495		N	34	36	34	32	31	36
1.237	1.399	2.551	0.846	0.8	0.484		p-value vs Control	-----	<0.0001	<0.0001	-----	0.5729	>0.9999
0.735	1.006	4.491	0.612	0.808	0.586		Test	Bonferroni's multiple comparisons
0.891	1.464	2.023	0.629	0.858	0.568
1.506	1.346	2.086	0.863	0.616	0.652
1.728	1.979	3.138	0.536	0.837	1.052
0.782	1.915	5.796	0.713	0.971	0.488			Table Analyzed	Ave Area of Mitochondria								Within each row, compare columns (simple effects within rows)
0.867	1.026	2.921	0.589	0.696	0.785
0.908	1.184	1.966	0.874	0.634	0.755			Two-way ANOVA			Ordinary						Number of families			2
0.754	2.344	6.138	0.521	0.927	0.85			Alpha			0.05						Number of comparisons per family			2
1.226	2.052	2.704	0.534	0.88	0.527												Alpha			0.05
0.895	1.839	1.749	0.472	0.577	0.686			Source of Variation			% of total variation	P value	P value summary	Significant?
1.199	1.231	4.337	0.475	0.719	0.806			Interaction			20.44	<0.0001	****	Yes			Bonferroni's multiple comparisons test			Predicted (LS) mean diff.	95.00% CI of diff.	Below threshold?	Summary	Adjusted P Value
0.831	0.684	1.697	0.627	0.984	0.523			Row Factor			32.68	<0.0001	****	Yes
1.053	1.241	4.549	0.781	0.828	0.477			Column Factor			19.49	<0.0001	****	Yes			GST
0.668	1.423	2	0.557	1.021	0.726												siControl vs. siDRP1			-0.54	-0.8287 to -0.2513	Yes	****	<0.0001
1.338	1.482	3.418	0.549	0.852	0.604			ANOVA table			SS (Type III)	DF	MS	F (DFn, DFd)	P value		siControl vs. K38A			-2.092	-2.385 to -1.799	Yes	****	<0.0001
0.871	0.951	2.769	0.71	1.196	0.482			Interaction			41.53	2	20.77	F (2, 197) = 72.70	P<0.0001
1.13	1.889	2.276	0.668	0.75	0.589			Row Factor			66.4	1	66.4	F (1, 197) = 232.4	P<0.0001		20k
0.937	2.109	4.476	0.79	0.628	0.847			Column Factor			39.59	2	19.8	F (2, 197) = 69.30	P<0.0001		siControl vs. siDRP1			-0.144	-0.4482 to 0.1603	No	ns	0.5729
1.104	1.394	2.587	0.546	0.873	0.71			Residual			56.27	197	0.2856				siControl vs. K38A			-0.01818	-0.3115 to 0.2751	No	ns	>0.9999
1.139	2.149	3.716	0.806	0.568	0.836
0.897	2.175	3.091	0.811	0.775	0.513			Difference between row means
1.03	2.81	2.505	0.762	0.862	0.723			Predicted (LS) mean of GST			1.877						Test details			Predicted (LS) mean 1	Predicted (LS) mean 2	Predicted (LS) mean diff.	SE of diff.	N1	N2	t	DF
0.959	2.718	2.417	0.814	0.707	0.697			Predicted (LS) mean of 20k			0.7317
0.854	0.93	2.885	0.778	1.062	0.833			Difference between predicted means			1.146						GST
1.035	1.427	1.992	0.638	0.846	0.754			SE of difference			0.07514						siControl vs. siDRP1			0.9999	1.54	-0.54	0.1278	34	36	4.225	197
1.49	1.499	2.595	0.713	1.232	0.605			95% CI of difference			0.9974 to 1.294						siControl vs. K38A			0.9999	3.092	-2.092	0.1296	34	34	16.14	197
0.756	1.882	4.468	0.494	0.595	0.717
0.893	1.509	2.92	0.71		0.621			Data summary									20k
0.699	0.932	2.829			0.666			Number of columns (Column Factor)			3						siControl vs. siDRP1			0.6777	0.8216	-0.144	0.1347	32	31	1.069	197
0.96	1.75	1.913			0.686			Number of rows (Row Factor)			2						siControl vs. K38A			0.6777	0.6958	-0.01818	0.1299	32	36	0.14	197
	1.137				0.922			Number of values			203
	2.134				0.473
