# Supplementary material for: Protective mitochondrial fission induced by stress-responsive protein GJA1-20k
Source: eLife. 2021 Oct 5;10:e69207. doi: 10.7554/eLife.69207 (PMC8492060; doi:10.7554/eLife.69207)
Supplement: Figure 3—source data 1. [file elife-69207-fig3-data1.xlsx]

## Sheet: Fig. 3C
Actin in mitochondria		Normalized by Tom20			Actin
GST	GJA1-20k				GST	GJA1-20k
1.62334	7.6719			Mean	1	5.87494
0.790937	4.1104			SD	0.432274	1.58951
0.647069	5.07248			N	4	4
0.938654	6.645			p-value vs GST	-----	0.0286
				Test	Mann-Whitney
	Table Analyzed			Actin in mitochondria
	Column B			GJA1-20k
	vs.			vs.
	Column A			GST
	Mann Whitney test
	P value			0.0286
	Exact or approximate P value?			Exact
	P value summary			*
	Significantly different (P < 0.05)?			Yes
	One- or two-tailed P value?			Two-tailed
	Sum of ranks in column A,B			10 , 26
	Mann-Whitney U			0
	Difference between medians
	Median of column A			0.8648, n=4
	Median of column B			5.859, n=4
	Difference: Actual			4.994
	Difference: Hodges-Lehmann			4.724
			GST	20k
	Number of values		4	4
	Minimum		0.6471	4.11
	25% Percentile		0.683	4.351
	Median		0.8648	5.859
	75% Percentile		1.452	7.415
	Maximum		1.623	7.672
	Mean		1	5.875
	Std. Deviation		0.4323	1.59
	Std. Error of Mean		0.2161	0.7948
	Lower 95% CI		0.3122	3.346
	Upper 95% CI		1.688	8.404
	Mean ranks		2.5	6.5

## Sheet: Fig. 3D
Actin Polymerization
Time(min)	Actin Only		Mean	Actin + GJA1-20k		Mean
0	0	0	0	0	0	0
1	116.127	177.032	146.579	100.374	118.438	109.406
2	290.112	282.758	286.435	209.77	311.26	260.515
3	458.841	416.14	437.49	274.059	476.261	375.16
4	609.708	559.573	584.64	370.094	652.654	511.374
5	795.975	746.81	771.392	460.112	875.551	667.832
6	955.31	912.455	933.882	552.543	1041.23	796.887
7	1119.97	1048.92	1084.45	648.144	1224.31	936.228
8	1289.33	1221.49	1255.41	751.956	1415.7	1083.83
9	1420.75	1362.88	1391.82	832.069	1578.47	1205.27
10	1561.54	1501.39	1531.47	916.94	1729.01	1322.97
11	1683.46	1636.09	1659.77	1009.93	1880.59	1445.26
12	1810.05	1771.34	1790.7	1092.2	2025.02	1558.61
13	1909.31	1891.11	1900.21	1185.2	2145.59	1665.39
14	2003.14	1983.15	1993.15	1259.24	2253.05	1756.14
15	2097.53	2081.4	2089.46	1342.22	2352.12	1847.17
16	2201.96	2182.07	2192.01	1403.52	2451.51	1927.51
17	2297.88	2281.23	2289.56	1498.49	2559.91	2029.2
18	2361.38	2347.69	2354.54	1570.94	2629.89	2100.41
19	2437.66	2449.64	2443.65	1633.26	2724.58	2178.92
20	2505.05	2535.23	2520.14	1707.69	2808.63	2258.16
21	2560.4	2590.33	2575.36	1751.26	2864.08	2307.67
22	2631.5	2647.8	2639.65	1827.64	2944.07	2385.86
23	2682.68	2707	2694.84	1865.84	2991.27	2428.55
24	2751.86	2787.12	2769.49	1950.13	3035.55	2492.84
25	2825	2849.64	2837.32	2003.85	3118.26	2561.05
26	2875.36	2918.29	2896.82	2058.25	3185.4	2621.82
27	2895.2	2930.79	2912.99	2089.81	3204.92	2647.37
28	2938.07	2982.68	2960.37	2143.68	3253.99	2698.83
29	2979.79	3033.82	3006.81	2187.39	3293.55	2740.47
30	3024.34	3075.23	3049.79	2234.1	3359.19	2796.65
31	3085.27	3116.35	3100.81	2296.82	3406.63	2851.72
32	3083.85	3159.85	3121.85	2340.68	3421.59	2881.14
33	3123.41	3164.06	3143.74	2336.45	3454.09	2895.27
34	3177.51	3229.24	3203.38	2406.79	3517.88	2962.33
35	3172.05	3223.02	3197.54	2422.55	3505.92	2964.23
36	3231.85	3280.96	3256.41	2455.42	3538.23	2996.82
37	3246.76	3292.79	3269.78	2506.9	3596.61	3051.75
38	3271.79	3328.85	3300.32	2532.42	3619.57	3075.99
39	3302.41	3368.3	3335.36	2557.34	3652.72	3105.03
40	3319.71	3387.11	3353.41	2578.89	3646.83	3112.86
41	3358.82	3418.12	3388.47	2631.64	3686.82	3159.23
42	3353.84	3419.72	3386.78	2650.45	3723.73	3187.09
43	3429.28	3475.43	3452.36	2674.2	3748.63	3211.42
44	3404.43	3468.75	3436.59	2678.64	3725.12	3201.88
45	3428.68	3484.3	3456.49	2699.73	3764.61	3232.17
46	3449.78	3506.04	3477.91	2723.54	3780.97	3252.26
47	3466.07	3524.98	3495.53	2745.19	3800.82	3273
48	3488.99	3542.68	3515.83	2776.15	3832.36	3304.25
49	3516.81	3567.41	3542.11	2808.51	3862.74	3335.62
50	3510.72	3578.97	3544.85	2807.47	3863.11	3335.29
51	3544.04	3597.63	3570.83	2816.76	3867.41	3342.08
52	3558.59	3623.77	3591.18	2844.5	3888.83	3366.66
53	3590.04	3641.87	3615.95	2876.41	3913.26	3394.83
54	3577.75	3675.91	3626.83	2917.71	3931.72	3424.71
55	3614.34	3682.24	3648.29	2923.65	3949.61	3436.63
56	3602.93	3679.91	3641.42	2909.59	3932.26	3420.92
57	3628.74	3683.4	3656.07	2946.95	3964.72	3455.84
58	3640.67	3701.43	3671.05	2962.05	3982.27	3472.16
59	3633.69	3681.75	3657.72	2953.06	3967.07	3460.07
60	3662.72	3725.71	3694.21	2980.64	4005	3492.82

## Sheet: Fig. 3E
Actin depolymerization
Time(min)	Actin Only			Mean	Actin + LatA			Mean	Actin + GJA1-20k			Mean	Actin + LatA + GJA1-20k			Mean
0	0	0	0	0	0	0	0	0	0	0	0	0	0	0	0	0
1	-22	-14.6745	2.8045	-11.29	8	4.077	-9.2635	0.937833	18.381	-44.3645	3.385	-7.53283	-8	4.2655	-3.051	-2.26183
2	-39	-20.8775	-19.9185	-26.5987	0	-8.5725	-18.346	-8.97283	5.154	-15.734	2.5165	-2.68783	-25	7.9125	0.0775	-5.67
3	-55	-29.432	-16.456	-33.6293	-15	-9.6	-17.3915	-13.9972	-6.8675	-0.182	1.0635	-1.99533	-46	15.174	11.465	-6.45367
4	-59	-27.629	-22.758	-36.4623	-16	-15.1965	-17.8065	-16.3343	4.4585	-42.026	-0.017	-12.5282	-62	32.7795	32.972	1.2505
5	-82	-51.4975	-60.764	-64.7538	-24	-34.0905	-47.313	-35.1345	2.594	7.2365	-8.714	0.372167	-60	25.706	29.307	-1.66233
6	-77	-53.98	-42.85	-57.9433	-50	-59.1425	-43.893	-51.0118	-2.2575	18.599	5.593	7.3115	-59	34.282	39.974	5.08533
7	-89	-69.128	-48.6855	-68.9378	-53	-66.154	-56.226	-58.46	2.3965	-33.4175	10.608	-6.80433	-54	40.099	44.4285	10.1758
8	-84	-61.725	-63.5255	-69.7502	-72	-59.5355	-58.7155	-63.417	0.363	30.9775	11.517	14.2858	-76	58.61	67.346	16.652
9	-102	-70.7475	-74.6445	-82.464	-86	-75.0685	-73.073	-78.0472	23.007	-13.263	-15.9005	-2.05217	-94	62.4375	66.013	11.4835
10	-125	-76.12	-80.443	-93.8543	-113	-93.1375	-81.731	-95.9562	-21.053	-21.371	4.628	-12.5987	-87	63.784	69.552	15.4453
11	-117	-82.9385	-83.7345	-94.5577	-124	-112.975	-93.049	-110.008	8.95	2.4685	-11.247	0.0571667	-93	60.8455	79.259	15.7015
12	-125	-79.8255	-83.6585	-96.1613	-133	-102.798	-90.1225	-108.64	14.5175	-16.749	16.057	4.6085	-115	84.214	85.0585	18.0908
13	-122	-92.298	-83.4365	-99.2448	-144	-123.056	-120.654	-129.237	-4.201	40.4765	32.4235	22.8997	-105	67.677	70.1325	10.9365
14	-134	-106.322	-86.5845	-108.969	-148	-139.388	-114.445	-133.945	4.537	28.9785	-9.1885	8.109	-97	75.553	92.1045	23.5525
15	-137	-109.79	-104.293	-117.027	-163	-146.032	-119.215	-142.749	-1.8635	-49.735	-3.9865	-18.5283	-104	82.518	97.0295	25.1825
16	-138	-113.386	-101.808	-117.731	-198	-161.55	-142.188	-167.246	-1.1775	14.6005	-4.9845	2.81283	-128	82.6315	86.6335	13.755
17	-145	-109.611	-109.889	-121.5	-201	-168.319	-142.864	-170.727	-2.7985	-22.1015	-4.7635	-9.88783	-104	85.139	87.1315	22.7568
18	-155	-135.791	-120.959	-137.25	-219	-185.088	-165.964	-190.017	20.045	67.5595	-3.488	28.0388	-123	74.5565	76.9355	9.49733
19	-170	-125.783	-114.385	-136.723	-341	-190.913	-177.095	-236.336	-12.534	-21.4005	10.624	-7.77017	-104	89.38	98.206	27.862
20	-211	-145.399	-123.92	-160.107	-317	-199.071	-193.141	-236.404	5.404	-24.2455	-7.8335	-8.89167	-188	82.84	87.1765	-5.9945
21	-187	-139.645	-129.089	-151.911	-323	-194.408	-199.738	-239.049	9.616	-7.0745	-4.917	-0.791833	-193	85.5325	86.516	-6.98383
22	-205	-152.327	-136.883	-164.737	-351	-209.7	-206.951	-255.884	-2.0945	2.234	15.139	5.09283	-192	85.5575	97.0785	-3.12133
23	-198	-160.312	-133.257	-163.857	-353	-212.994	-210.459	-258.818	-3.2405	-14.725	-5.2305	-7.732	-188	68.9165	87.569	-10.5048
24	-207	-146.115	-153.802	-168.972	-385	-212.763	-217.381	-271.715	-1.0865	19.45	8.343	8.90217	-199	94.347	106.609	0.652
25	-217	-171.111	-140.698	-176.269	-387	-221.923	-236.889	-281.938	9.0365	-23.692	-7.2285	-7.29467	-205	91.148	35.229	-26.2077
26	-220	-158.484	-159.108	-179.197	-402	-233.879	-243.671	-293.183	-12.0635	21.5445	10.3285	6.60317	-206	79.9695	90.321	-11.9032
27	-213	-165.645	-165.558	-181.401	-388	-233.508	-252.619	-291.376	-2.204	-19.8165	-5.081	-9.03383	-193	81.6455	97.089	-4.75517
28	-225	-169.2	-169.006	-187.735	-410	-257.646	-269.095	-312.247	-6.076	26.141	7.057	9.04067	-205	84.732	100.824	-6.48133
30	-233	-169.509	-163.827	-188.779	-436	-277.614	-267.985	-327.2	12.5435	-27.776	9.009	-2.0745	-211	87.0855	96.33	-9.19483
31	-234	-183.174	-182.416	-199.863	-448	-312.932	-288.495	-349.809	-0.7025	78.692	-15.538	20.8172	-212	68.33	88.1645	-18.5018
32	-221	-189.667	-175.084	-195.251	-446	-328.592	-305.553	-360.048	7.0295	-22.377	11.284	-1.3545	-196	86.105	100.511	-3.12783
33	-238	-195.969	-188.107	-207.359	-485	-354.29	-316.233	-385.174	-3.8645	-25.981	2.214	-9.2105	-228	74.843	90.7205	-20.8122
34	-255	-192.858	-178.31	-208.723	-481	-376.983	-309.928	-389.304	6.9835	47.205	-9.2645	14.9747	-203	88.2365	91.21	-7.85117
35	-246	-202.076	-204.361	-217.479	-504	-389.824	-329.099	-407.641	-2.763	-15.8785	-7.4695	-8.70367	-213	81.2305	82.6845	-16.3617
36	-243	-198.706	-198.81	-213.505	-516	-386.261	-325.459	-409.24	-7.6855	-34.8575	15.817	-8.90867	-204	86.7685	95.404	-7.27583
37	-265	-208.794	-194.642	-222.812	-525	-393.257	-334.779	-417.678	8.1235	14.528	17.633	13.4282	-217	83.293	96.8245	-12.2942
38	-256	-210.203	-213.375	-226.526	-538	-407.151	-335.546	-426.899	10.485	15.672	-26.1625	-0.00183333	-208	74.2815	78.242	-18.4922
39	-254	-225.434	-208.204	-229.213	-553	-415.481	-368.169	-445.55	-4.0655	-24.3885	9.927	-6.17567	-224	72.3415	86.8245	-21.6113
40	-254	-213.611	-197.612	-221.741	-556	-416.124	-361.316	-444.48	-10.4635	-1.8	3.929	-2.77817	-220	78.3975	83.2365	-19.4553
41	-280	-219.377	-229.858	-243.078	-577	-420.971	-392.168	-463.38	23.962	0.01	-19.7195	1.4175	-225	72.5145	85.9355	-22.1833
42	-248	-214.958	-218.951	-227.303	-557	-410.678	-376.139	-447.939	7.1375	-36.1475	26.174	-0.945333	-196	97.998	95.233	-0.923
43	-264	-213.543	-216.042	-231.195	-576	-424.276	-381.774	-460.683	6.95	25.2625	13.3235	15.1787	-212	89.8685	108.701	-4.477
44	-267	-229.968	-220.185	-239.051	-591	-443.36	-401.599	-478.653	-3.366	-12.9875	-25.5125	-13.9553	-220	84.111	95.34	-13.5163
45	-272	-237.457	-223.85	-244.436	-601	-453.986	-395.338	-483.441	-12.665	-7.9635	15.319	-1.76983	-221	73.9745	92.5765	-18.1497
46	-269	-226.899	-224.702	-240.2	-617	-448.993	-401.693	-489.229	12.1485	23.281	3.1625	12.864	-215	111.194	99.542	-1.4215
47	-272	-239.91	-235.411	-249.107	-631	-476.608	-416.512	-508.04	4.1775	-37.0615	-3.348	-12.0773	-213	94.599	101.445	-5.652
48	-282	-250.016	-231.937	-254.651	-638	-472.95	-424.226	-511.725	-19.1595	0.566	3.0805	-5.171	-208	83.9055	94.507	-9.8625
49	-287	-250.442	-241.923	-259.788	-659	-461.223	-432.962	-517.728	12.582	0.9635	15.249	9.59817	-216	72.9065	85.1055	-19.3293
50	-286	-239.56	-248.873	-258.145	-666	-441.307	-450.754	-519.354	-6.0465	-1.6905	-26.6155	-11.4508	-228	95.5745	94.8825	-12.5143
51	-283	-259.188	-247.03	-263.073	-680	-451.866	-457.199	-529.689	12.251	-23.6675	-3.1385	-4.85167	-217	67.1915	77.031	-24.2592
52	-300	-256.173	-243.827	-266.666	-696	-449.062	-442.8	-529.287	-10.06	21.0385	21.2285	10.7357	-228	97.9495	99.827	-10.0745
53	-302	-267.291	-258.998	-276.096	-733	-453.629	-453.782	-546.804	17.236	-4.4755	-16.2595	-1.16633	-226	75.1685	101.134	-16.5658
54	-301	-256.788	-244.201	-267.33	-736	-459.51	-454.906	-550.139	-5.2475	-28.376	12.604	-7.0065	-229	91.164	102.832	-11.6678
55	-303	-253.86	-266.07	-274.31	-741	-467.822	-455.192	-554.671	16.904	37.912	-2.865	17.317	-229	80.5725	103.41	-15.0057
56	-290	-275.19	-260.993	-275.395	-750	-517.637	-463.844	-577.16	-20.4755	-40.5865	2.0245	-19.6792	-221	81.2695	93.889	-15.2805
57	-300	-276.022	-270.063	-282.029	-764	-519.271	-471.533	-584.934	-3.497	-6.2185	-2.587	-4.10083	-229	81.6105	114.471	-10.9728
58	-296	-268.528	-264.657	-276.395	-774	-530.979	-479.952	-594.977	18.8695	-13.603	24.7565	10.0077	-221	96.426	117.278	-2.43183
59	-300	-281.925	-270.39	-284.105	-786	-548.928	-473.008	-602.645	2.635	24.423	-24.758	0.766667	-215	83.1465	114.074	-5.9265
60	-306	-277.826	-263.082	-282.303	-791	-548.069	-460.498	-599.856	-3.165	-5.544	6.3875	-0.773833	-231	109.519	125.228	1.24917

## Sheet: Fig. 3G
HEK293							HEK293
GST		GJA1-20k					GST		GJA1-20k
DMSO	LatA	DMSO	LatA				DMSO	LatA	DMSO	LatA
1.203	1.216	0.876	0.691			Mean	1	1.37052	0.657571	0.660687
1.109	1.092	0.534	0.816			SD	0.212821	0.34122	0.11302	0.14574
0.811	1.752	0.634	0.758			N	32	33	28	32
0.934	1.335	0.577	0.417			p-value vs DMSO	-----	<0.0001	-----	>0.9999
1.386	0.849	0.605	0.425			Test	Bonferroni's multiple comparisons
1.184	1.348	0.645	0.645
1.008	1.554	0.536	0.867
1.036	1.169	0.731	0.604
0.923	1.922	0.827	0.561
1.057	1.008	0.546	0.592
1.269	0.866	0.756	0.923			Table Analyzed			Ave Area of Mitochondria						Compare each cell mean with the other cell mean in that row
1.095	2.316	0.776	0.6
1.468	1.4	0.505	0.522			Two-way ANOVA			Ordinary						Number of families			1
0.417	1.245	0.748	0.917			Alpha			0.05						Number of comparisons per family			2
0.782	1.186	0.634	0.709												Alpha			0.05
0.804	1.143	0.63	0.383			Source of Variation			% of total variation	P value	P value summary	Significant?
1.101	1.444	0.615	0.598			Interaction			6.146	<0.0001	****	Yes			Bonferroni's multiple comparisons test			Predicted (LS) mean diff.	95.00% CI of diff.	Significant?	Summary	Adjusted P Value
0.718	0.942	0.527	0.841			Row Factor			50.41	<0.0001	****	Yes
1.007	1.244	0.549	0.619			Column Factor			6.356	<0.0001	****	Yes			DMSO - LatA
1.084	2.133	0.811	0.608												GST			-0.3705	-0.4973 to -0.2437	Yes	****	<0.0001
1.015	1.134	0.498	0.767			ANOVA table			SS (Type III)	DF	MS	F (DFn, DFd)	P value		GJA1-20k			-0.003116	-0.1353 to 0.1291	No	ns	>0.9999
0.861	1.602	0.645	0.693			Interaction			1.05	1	1.05	F (1, 121) = 20.72	P<0.0001
1.196	1.533	0.578	0.787			Row Factor			8.616	1	8.616	F (1, 121) = 170.0	P<0.0001
0.91	1.55	0.624	0.654			Column Factor			1.086	1	1.086	F (1, 121) = 21.43	P<0.0001		Test details			Predicted (LS) mean 1	Predicted (LS) mean 2	Predicted (LS) mean diff.	SE of diff.	N1	N2	t	DF
1.147	1.113	0.851	0.646			Residual			6.133	121	0.05069
0.945	1.6	0.786	0.682												DMSO - LatA
0.979	1.078	0.76	0.595			Difference between column means									GST			1	1.371	-0.3705	0.05586	32	33	6.633	121
0.881	1.829	0.608	0.701			Predicted (LS) mean of DMSO			0.8288						GJA1-20k			0.6576	0.6607	-0.003116	0.05826	28	32	0.05349	121
0.722	1.298		0.863			Predicted (LS) mean of LatA(100nM)			1.016
0.782	1.338		0.752			Difference between predicted means			-0.1868
1.242	1.165		0.455			SE of difference			0.04036
0.924	1.304		0.451			95% CI of difference			-0.2667 to -0.1069
	1.519
						Difference between row means
						Predicted (LS) mean of GST			1.185
						Predicted (LS) mean of GJA1-20k			0.6591
						Difference between predicted means			0.5261
						SE of difference			0.04036
						95% CI of difference			0.4462 to 0.6060
						Interaction CI
						Mean diff, A1 - B1			-0.3705
						Mean diff, A2 - B2			-0.003116
						(A1 -B1) - (A2 - B2)			-0.3674
						95% CI of difference			-0.5272 to -0.2076
						(B1 - A1) - (B2 - A2)			0.3674
						95% CI of difference			0.2076 to 0.5272
						Data summary
						Number of columns (Column Factor)			2
						Number of rows (Row Factor)			2
						Number of values			125
