# Supplementary material for: Protective mitochondrial fission induced by stress-responsive protein GJA1-20k
Source: eLife. 2021 Oct 5;10:e69207. doi: 10.7554/eLife.69207 (PMC8492060; doi:10.7554/eLife.69207)
Supplement: Figure 4—figure supplement 1—source data 1. [file elife-69207-fig4-figsupp1-data1.xlsx]

## Sheet: fig4 sup 1E
GJA1-20k*Actin
time	intensity
-15	6901.14
-12	8343.11
-9	8237.6
-6	7836.33
-3	8260.11
0	10919.2
3	10322.2
6	9189.75
9	10739.2
12	11000.8
15	10601
18	10780.5
21	9434.28
24	9867.21
27	9737.35
30	10519.8
33	10125.8
36	10555.1
39	10075.4
42	11304.1
45	9462.64
48	9863.83
51	10184.2
54	9850.71
57	8501.54
60	8689.69

## Sheet: fig4 sup 1F
Mitochondria
time	intensity
-15	8437.8
-12	8306.4
-9	8701.7
-6	8473.5
-3	8571.6
0	7901.4
3	6818.1
6	7866.2
9	6624.5
12	7603
15	7092.6
18	8639.4
21	7981.1
24	7511.9
27	6008.9
30	7191
33	7352.5
36	5834.3
39	6886.5
42	4553.9
45	3271.7
48	3302.3
51	2766.5
54	4433.3
57	4175.6
60	3597.1

## Sheet: fig4 sup 1H
mitochondria #	Time-to-Fision (sec)
1	45
2	45
3	75
4	60
5	45
6	60
7	54
8	27
9	45
10	27
11	36
12	48
13	36
14	45
15	33
16	39
17	42
18	54
19	48
20	45
21	48
22	54
23	45
24	27
25	48
26	30
27	45
28	48
29	30
