# Supplementary material for: Protective mitochondrial fission induced by stress-responsive protein GJA1-20k
Source: eLife. 2021 Oct 5;10:e69207. doi: 10.7554/eLife.69207 (PMC8492060; doi:10.7554/eLife.69207)
Supplement: Figure 4—source data 1. [file elife-69207-fig4-data1.xlsx]

## Sheet: Fig. 4D
GJA1-20k*Actin
time	intensity
-15	26687.9
-12	32588.2
-9	34487.1
-6	27575.1
-3	38349.7
0	63402.7
3	71130.6
6	65589.2
9	58208.9
12	58291.7
15	69532.5
18	77985
21	57005.2
24	73599.7
27	66442.9
30	66041.9
33	72394.1
36	76333
39	83614.2
42	82826.8
45	82888.8
48	75447.9
51	65398.8
54	70895.8
57	71071.3
60	59588

## Sheet: Fig. 4E
Mitochondria
time	intensity
-15	19142
-12	15370.1
-9	12415.4
-6	12217.7
-3	13961.6
0	14085.2
3	11397.3
6	25144
9	17819.4
12	18398.3
15	15925
18	22066
21	13336.9
24	19212.9
27	15072.3
30	24533.1
33	18345.8
36	19057.1
39	11925.4
42	9933.36
45	3067.02
48	2818.39
51	2979.93
54	3057.12
57	3054.62
60	3132.43

## Sheet: Fig. 4G
mitochondria #	Time-to-Fision (sec)
1	45
2	48
3	45
4	24
5	45
6	45
7	33
8	45
9	36
10	30
11	39
12	60
13	45
14	42
15	51
16	45
17	42
18	45
19	42
20	51
21	45
22	42
23	48
24	48
25	27
26	27
27	45
28	39
29	33
30	45
