# Supplementary material for: Protective mitochondrial fission induced by stress-responsive protein GJA1-20k
Source: eLife. 2021 Oct 5;10:e69207. doi: 10.7554/eLife.69207 (PMC8492060; doi:10.7554/eLife.69207)
Supplement: Figure 5—figure supplement 1—source data 1. [file elife-69207-fig5-figsupp1-data1.xlsx]

## Sheet: fig5 sup 1B
Ave. mito area				Ave. mito area
WT	M213L(het)			WT	M213L(het)
1.04119	0.457179		Mean	1	0.954166
0.924368	0.623689		SEM	0.0401554	0.0569467
1.18888	0.497831		N	46	48
0.765157	1.14765		p-value vs WT	-----	0.307
1.06576	0.731335		Test	Mann-Whitney
1.10132	0.65014
0.680927	0.603273
0.552142	1.4377		ave. mito area		Neo CM (WT vs het)
0.563272	0.62181
0.437016	0.713484		Column B			het
0.538627	0.550444		vs.			vs.
0.683565	0.742067		Column A			WT
0.6694	0.56403
1.3044	0.39351		Mann Whitney test
0.663365	0.342126		P value			0.307
1.11881	0.727722		Exact or approximate P value?			Exact
1.37345	0.435643		P value summary			ns
1.15972	0.918659		Significantly different (P < 0.05)?			No
1.64353	1.20326		One- or two-tailed P value?			Two-tailed
0.783731	0.747198		Sum of ranks in column A,B			2321 , 2144
1.13796	0.995807		Mann-Whitney U			968
0.725626	0.597347
0.847401	0.561176		Difference between medians
1.09384	0.753052		Median of column A			1.015, n=46
0.918623	1.31462		Median of column B			0.8605, n=48
0.843534	0.706799		Difference: Actual			-0.1541
1.28557	1.33186		Difference: Hodges-Lehmann			-0.087
1.28116	1.61588
0.803208	0.861602				WT	het
0.83497	1.76938		Number of values		46	48
0.938172	0.773179
1.61064	1.4888		Minimum		0.437	0.3421
0.933221	0.999348		25% Percentile		0.7983	0.6303
0.985255	1.14316		Median		1.015	0.8605
1.12737	0.859433		75% Percentile		1.167	1.249
1.24192	0.976077		Maximum		1.644	1.786
1.03451	0.705896
0.99465	0.755473		Mean		1	0.9542
1.12203	1.78629		Std. Deviation		0.2723	0.3945
0.894231	1.21168		Std. Error of Mean		0.04016	0.05695
1.25565	0.909444
0.98764	1.01947		Lower 95% CI		0.9191	0.8396
1.20517	1.57787		Upper 95% CI		1.081	1.069
1.36572	1.75067
1.15097	1.49111		Mean ranks		50.46	44.67
1.12231	1.28355
	1.2618
	1.19047

## Sheet: fig5 sup 1C
Basal					Basal					proton leak						proton leak				Max					Max					ATP-linked						ATP-linked				Reserve capacity						Reserve capacity
WT	het	M213L			WT	het	M213L			WT	het	M213L				WT	het	M213L		WT	het	M213L			WT	het	M213L			WT	het	M213L				WT	het	M213L		WT	het	M213L				WT	het	M213L
11.16	13.91	11.21		Mean	12.5825	12.8296	18.2494			4.45	7.33	5.64			Mean	5.82375	7.85875	12.4669		17.96	24.36	19.41		Mean	17.4621	24.8154	35.6706			6.71	6.58	5.57			Mean	6.75875	4.97	5.7825		6.71	6.58	5.57			Mean	6.75875	4.97	5.7825
4.95	16.1	5.72		SEM	1.82205	3.37556	4.24564			1.72	9.58	3.08			SEM	1.30162	2.08599	2.63887		6.42	27.17	10.62		SEM	2.39458	6.0254	8.48149			3.23	6.52	2.64			SEM	0.728303	1.33826	1.82598		3.23	6.52	2.64			SEM	0.728303	1.33826	1.82598
8.45	45.25	13.91		N	24	24	16			2.65	26.81	7.33			N	24	24	16		10.52	79.59	24.36		N	24	24	16			5.8	18.44	6.58			N	24	24	16		5.8	18.44	6.58			N	24	24	16
10.52	68.57	16.1		p-value vs WT	-----	0.3052	0.686			1.64	40.46	9.58			p-value vs WT	-----	>0.9999	0.0313		15.08	129.05	27.17		p-value vs WT	-----	>0.9999	0.0716			8.88	28.11	6.52			p-value vs WT	-----	0.0079	0.0978		8.88	28.11	6.52			p-value vs WT	-----	0.0079	0.0978
10.77	11.38	45.25		Test	Dunn's multiple comarisons					2.94	7.16	26.81			Test	Dunn's multiple comarisons				19.63	21.99	79.59		Test	Dunn's multiple comarisons					7.83	4.22	18.44			Test	Dunn's multiple comarisons				7.83	4.22	18.44			Test	Dunn's multiple comarisons
7.35	3.3	68.57								2.64	2.02	40.46								10.65	6.32	129.1								4.71	1.28	28.11								4.71	1.28	28.11
15.29	4.87	11.38								4.45	2.42	7.16								22.64	10.09	21.99								10.84	2.45	4.22								10.84	2.45	4.22
12.45	39.5	3.3								4.32	24.59	2.02								19.29	68.79	6.32								8.13	14.91	1.28								8.13	14.91	1.28
20.12	8.42	4.87								8.39	5.31	2.42								26.27	9.83	10.09								11.73	3.11	2.45								11.73	3.11	2.45
6.5	11.14	8.41								2.27	8.06	7.46								8.22	13.5	17.98								4.23	3.08	0.95								4.23	3.08	0.95
11.1	26.55	9.09								4.13	21.64	7.58								13.81	40.01	18.59								6.97	4.91	1.51								6.97	4.91	1.51
6.36	5.31	17.98								2.41	3.61	12.66								8.15	7.86	25.47								3.95	1.7	5.32								3.95	1.7	5.32
6.38	10.41	16.77								2.48	7.56	15.23								8.22	15.7	31.45								3.9	2.85	1.54								3.9	2.85	1.54
4.48	11.45	13.68								1.54	7.46	11.77								6.49	21.9	24.98								2.94	3.99	1.91								2.94	3.99	1.91
18.72	0.79	14.55								7.85	0.37	13.08								23.58	3.1	33.48								10.87	0.42	1.47								10.87	0.42	1.47
8.25	5.35	31.2								2.93	3.26	27.19								11.03	19.72	90.13								5.32	2.09	4.01								5.32	2.09	4.01
14.17	0.67									5.07	0.32									18.47	2.33									9.1	0.34									9.1	0.34
21.04	2.57									8.25	1.49									34.53	9.89									12.79	1.08									12.79	1.08
2.47	5.18									1.16	1.96									4.43	19.65									1.31	3.22									1.31	3.22
2.44	1.74									1.03	0.78									3.91	6.69									1.41	0.96									1.41	0.96
24.08	2.42									14.3	1.05									24.9	2.83									9.78	1.37									9.78	1.37
14.45	7.34									10.61	2.53									19.57	36.43									3.84	4.8									3.84	4.8
16.47	4.25									12.12	2									28.79	13.32									4.35	2.25									4.35	2.25
44.01	1.44									30.42	0.84									56.53	5.45									13.59	0.6									13.59	0.6
Table Analyzed				basal						Table Analyzed				proton leak						Table Analyzed				max						Table Analyzed				ATP-linked						Table Analyzed				reserve capacity
Kruskal-Wallis test										Kruskal-Wallis test										Kruskal-Wallis test										Kruskal-Wallis test										Kruskal-Wallis test
P value				0.0743						P value				0.021						P value				0.0749						P value				0.0117						P value				0.0117
Exact or approximate P value?				Approximate						Exact or approximate P value?				Approximate						Exact or approximate P value?				Approximate						Exact or approximate P value?				Approximate						Exact or approximate P value?				Approximate
P value summary				ns						P value summary				*						P value summary				ns						P value summary				*						P value summary				*
Do the medians vary signif. (P < 0.05)?				No						Do the medians vary signif. (P < 0.05)?				Yes						Do the medians vary signif. (P < 0.05)?				No						Do the medians vary signif. (P < 0.05)?				Yes						Do the medians vary signif. (P < 0.05)?				Yes
Number of groups				3						Number of groups				3						Number of groups				3						Number of groups				3						Number of groups				3
Kruskal-Wallis statistic				5.198						Kruskal-Wallis statistic				7.725						Kruskal-Wallis statistic				5.183						Kruskal-Wallis statistic				8.895						Kruskal-Wallis statistic				8.895
Data summary										Data summary										Data summary										Data summary										Data summary
Number of treatments (columns)				3						Number of treatments (columns)				3						Number of treatments (columns)				3						Number of treatments (columns)				3						Number of treatments (columns)				3
Number of values (total)				64						Number of values (total)				64						Number of values (total)				64						Number of values (total)				64						Number of values (total)				64
Number of families			1							Number of families			1							Number of families			1							Number of families			1							Number of families			1
Number of comparisons per family			2							Number of comparisons per family			2							Number of comparisons per family			2							Number of comparisons per family			2							Number of comparisons per family			2
Alpha			0.05							Alpha			0.05							Alpha			0.05							Alpha			0.05							Alpha			0.05
Dunn's multiple comparisons test			Mean rank diff.	Significant?	Summary	Adjusted P Value	A-?			Dunn's multiple comparisons test			Mean rank diff.	Significant?	Summary	Adjusted P Value	A-?			Dunn's multiple comparisons test			Mean rank diff.	Significant?	Summary	Adjusted P Value	A-?			Dunn's multiple comparisons test			Mean rank diff.	Significant?	Summary	Adjusted P Value	A-?			Dunn's multiple comparisons test			Mean rank diff.	Significant?	Summary	Adjusted P Value	A-?
WT vs. het			7.688	No	ns	0.3052	B	het		WT vs. het			0.7917	No	ns	>0.9999	B	het		WT vs. het			-0.8125	No	ns	>0.9999	B	het		WT vs. het			15.5	Yes	**	0.0079	B	het		WT vs. het			15.5	Yes	**	0.0079	B	het
WT vs. KO			-5.698	No	ns	0.686	C	KO		WT vs. KO			-14.52	Yes	*	0.0313	C	KO		WT vs. KO			-12.61	No	ns	0.0716	C	KO		WT vs. KO			11.83	No	ns	0.0978	C	KO		WT vs. KO			11.83	No	ns	0.0978	C	KO
Test details			Mean rank 1	Mean rank 2	Mean rank diff.	n1	n2	Z		Test details			Mean rank 1	Mean rank 2	Mean rank diff.	n1	n2	Z		Test details			Mean rank 1	Mean rank 2	Mean rank diff.	n1	n2	Z		Test details			Mean rank 1	Mean rank 2	Mean rank diff.	n1	n2	Z		Test details			Mean rank 1	Mean rank 2	Mean rank diff.	n1	n2	Z
WT vs. het			33.96	26.27	7.688	24	24	1.43		WT vs. het			29.17	28.38	0.7917	24	24	0.1473		WT vs. het			29.04	29.85	-0.8125	24	24	0.1512		WT vs. het			41.27	25.77	15.5	24	24	2.884		WT vs. het			41.27	25.77	15.5	24	24	2.884
WT vs. KO			33.96	39.66	-5.698	24	16	0.9483		WT vs. KO			29.17	43.69	-14.52	24	16	2.417		WT vs. KO			29.04	41.66	-12.61	24	16	2.099		WT vs. KO			41.27	29.44	11.83	24	16	1.969		WT vs. KO			41.27	29.44	11.83	24	16	1.969
		WT	het	KO								WT	het	KO								WT	het	KO								WT	het	KO								WT	het	KO
Number of values		24	24	16						Number of values		24	24	16						Number of values		24	24	16						Number of values		24	24	16						Number of values		24	24	16
Minimum		2.44	0.67	3.3						Minimum		1.03	0.32	2.02						Minimum		3.91	2.33	6.32						Minimum		1.31	0.34	0.95						Minimum		1.31	0.34	0.95
25% Percentile		6.41	2.753	8.58						25% Percentile		2.305	1.608	6.02						25% Percentile		8.22	6.983	18.13						25% Percentile		3.913	1.303	1.518						25% Percentile		3.913	1.303	1.518
Median		10.94	6.345	13.8						Median		3.535	3.435	8.58						Median		16.52	14.6	24.67						Median		6.255	2.965	3.325						Median		6.255	2.965	3.325
75% Percentile		16.18	13.3	17.68						75% Percentile		8.15	7.935	14.69						75% Percentile		23.35	26.47	32.97						75% Percentile		9.61	4.883	6.283						75% Percentile		9.61	4.883	6.283
Maximum		44.01	68.57	68.57						Maximum		30.42	40.46	40.46						Maximum		56.53	129.1	129.1						Maximum		13.59	28.11	28.11						Maximum		13.59	28.11	28.11
Mean		12.58	12.83	18.25						Mean		5.824	7.859	12.47						Mean		17.46	24.82	35.67						Mean		6.759	4.97	5.783						Mean		6.759	4.97	5.783
Std. Deviation		8.926	16.54	16.98						Std. Deviation		6.377	10.22	10.56						Std. Deviation		11.73	29.52	33.92						Std. Deviation		3.568	6.556	7.304						Std. Deviation		3.568	6.556	7.304
Std. Error of Mean		1.822	3.376	4.246						Std. Error of Mean		1.302	2.086	2.639						Std. Error of Mean		2.395	6.025	8.479						Std. Error of Mean		0.7283	1.338	1.826						Std. Error of Mean		0.7283	1.338	1.826
Lower 95% CI		8.813	5.847	9.2						Lower 95% CI		3.131	3.544	6.842						Lower 95% CI		12.51	12.35	17.59						Lower 95% CI		5.252	2.202	1.891						Lower 95% CI		5.252	2.202	1.891
Upper 95% CI		16.35	19.81	27.3						Upper 95% CI		8.516	12.17	18.09						Upper 95% CI		22.42	37.28	53.74						Upper 95% CI		8.265	7.738	9.674						Upper 95% CI		8.265	7.738	9.674
Mean ranks		33.96	26.27	39.66						Mean ranks		29.17	28.38	43.69						Mean ranks		29.04	29.85	41.66						Mean ranks		41.27	25.77	29.44						Mean ranks		41.27	25.77	29.44
[truncated: 7 more columns]

## Sheet: fig5 sup 1E
Mito SOX							Mito SOX
GST		GJA1-20k					GST		GJA1-20k
PBS	H2O2	PBS	H2O2				PBS	H2O2	PBS	H2O2
0.29	1.52	0.17	1.53			Mean	1	2.89146	0.742432	1.21865
0.32	1.13	0.28	4.47			SD	0.696227	1.86189	0.533481	1.01142
0.83	2.04	2.19	0.88			N	39	41	37	37
1.72	1	0.36	2.51			p-value vs PBS(GST)	-----	<0.0001	>0.9999	>0.9999
2.31	0.35	1.78	3.28			p-value vs H2O2(GST)	-----	-----	<0.0001	<0.0001
1.68	4.17	1.07	1.99			Test	Bonferroni's multiple comparisons
0.26	7.52	0.28	0.77
0.25	4.26	0.43	1.87
3.77	4.04	1.1	3.06
0.24	3.23	0.5	2.32		Table Analyzed			MitoSOX						Compare cell means regardless of rows and columns
1.54	1.6	1.12	0.68
0.79	6.84	0.25	1.41		Two-way ANOVA			Ordinary						Number of families			1
0.83	5.17	2.11	0.7		Alpha			0.05						Number of comparisons per family			6
0.26	4.3	0.24	0.42											Alpha			0.05
0.91	6.99	0.3	0.56		Source of Variation			% of total variation	P value	P value summary	Significant?
1.05	6.99	0.72	1.01		Interaction			6.062	0.0002	***	Yes			Bonferroni's multiple comparisons test			Predicted (LS) mean diff.	95.00% CI of diff.	Below threshold?	Summary	Adjusted P Value
1.24	2.44	0.9	2.58		Row Factor			11.28	<0.0001	****	Yes
0.35	2.72	0.49	1		Column Factor			16.97	<0.0001	****	Yes			GST:PBS vs. GST:H2O2			-1.891	-2.589 to -1.194	Yes	****	<0.0001
0.38	2.46	0.48	1.89											GST:PBS vs. GJA1-20k:PBS			0.2576	-0.4583 to 0.9734	No	ns	>0.9999
0.56	1.78	0.61	1.59		ANOVA table			SS (Type III)	DF	MS	F (DFn, DFd)	P value		GST:PBS vs. GJA1-20k:H2O2			-0.2186	-0.9345 to 0.4972	No	ns	>0.9999
0.41	1.71	0.82	1.43		Interaction			19.24	1	19.24	F (1, 150) = 14.14	P=0.0002		GST:H2O2 vs. GJA1-20k:PBS			2.149	1.442 to 2.856	Yes	****	<0.0001
0.41	1.33	0.67	1.78		Row Factor			35.8	1	35.8	F (1, 150) = 26.30	P<0.0001		GST:H2O2 vs. GJA1-20k:H2O2			1.673	0.9655 to 2.380	Yes	****	<0.0001
0.71	3.79	0.2	1.64		Column Factor			53.86	1	53.86	F (1, 150) = 39.57	P<0.0001		GJA1-20k:PBS vs. GJA1-20k:H2O2			-0.4762	-1.201 to 0.2490	No	ns	0.4871
0.9	3.18	0.65	0.57		Residual			204.2	150	1.361
0.72	2.11	0.41	0.41
0.85	1.33	0.39	0.84		Difference between column means									Test details			Predicted (LS) mean 1	Predicted (LS) mean 2	Predicted (LS) mean diff.	SE of diff.	N1	N2	t	DF
0.96	2.71	0.33	0.26		Predicted (LS) mean of PBS			0.8712
0.56	2.08	0.9	0.41		Predicted (LS) mean of H2O2			2.055						GST:PBS vs. GST:H2O2			1	2.891	-1.891	0.261	39	41	7.248	150
1.24	2.99	1.65	0.61		Difference between predicted means			-1.184						GST:PBS vs. GJA1-20k:PBS			1	0.7424	0.2576	0.2677	39	37	0.962	150
1.06	1.99	0.65	0.41		SE of difference			0.1882						GST:PBS vs. GJA1-20k:H2O2			1	1.219	-0.2186	0.2677	39	37	0.8166	150
1.23	6.53	0.87	0.44		95% CI of difference			-1.556 to -0.8120						GST:H2O2 vs. GJA1-20k:PBS			2.891	0.7424	2.149	0.2645	41	37	8.124	150
1.62	2.32	0.3	0.29											GST:H2O2 vs. GJA1-20k:H2O2			2.891	1.219	1.673	0.2645	41	37	6.323	150
1.68	1.82	1.41	0.41		Difference between row means									GJA1-20k:PBS vs. GJA1-20k:H2O2			0.7424	1.219	-0.4762	0.2712	37	37	1.756	150
2.02	1.85	1.17	0.32		Predicted (LS) mean of GST			1.946
0.83	1.27	1.04	0.3		Predicted (LS) mean of GJA1-20k			0.9805
1.16	2.39	0.19	0.25		Difference between predicted means			0.9652
1.41	0.89	0.44	0.2		SE of difference			0.1882
0.91	1.74				95% CI of difference			0.5933 to 1.337
0.74	2.7
	1.2				Interaction CI
	2.07				Mean diff, A1 - B1			-1.891
					Mean diff, A2 - B2			-0.4762
					(A1 -B1) - (A2 - B2)			-1.415
					95% CI of difference			-2.159 to -0.6715
					(B1 - A1) - (B2 - A2)			1.415
					95% CI of difference			0.6715 to 2.159
					Data summary
					Number of columns (Column Factor)			2
					Number of rows (Row Factor)			2
					Number of values			154

## Sheet: fig5 sup 1G
Ave mito area				Ave mito area
GST	DRP1			GST	DRP1
1.83534	0.324209		Mean	1	0.435622
0.764322	0.412857		SD	0.251056	0.121611
1.09452	0.243857		N	51	47
0.809829	0.292683		p-value vs GST	-----	<0.0001
1.17092	0.360523		Test	Mann-Whitney
0.69039	0.464594
1.34836	0.714435
1.07632	0.390117		Table Analyzed		mito size with DRP1 oe
1.03408	0.586019
1.53776	0.292819		Column B			DRP1
0.853242	0.445227		vs.			vs.
0.624944	0.437719		Column A			GST
1.07482	0.47202
0.902857	0.559362		Mann Whitney test
1.5655	0.436849		P value			<0.0001
1.10608	0.448491		Exact or approximate P value?			Exact
0.890236	0.563578		P value summary			****
0.879301	0.842335		Significantly different (P < 0.05)?			Yes
0.94102	0.283244		One- or two-tailed P value?			Two-tailed
1.10711	0.521036		Sum of ranks in column A,B			3704 , 1147
0.910256	0.580497		Mann-Whitney U			19
0.597988	0.381739
0.898369	0.371049		Difference between medians
0.634655	0.550712		Median of column A			0.9393, n=51
0.939334	0.36463		Median of column B			0.4368, n=47
0.907454	0.42858		Difference: Actual			-0.5025
0.794597	0.408206		Difference: Hodges-Lehmann			-0.5321
0.739216	0.222069
0.937892	0.438807				GST	DRP1
1.08192	0.347085		Number of values		51	47
1.02314	0.287025
0.841437	0.379618		Minimum		0.598	0.2221
0.903183	0.284006		25% Percentile		0.8414	0.3605
1.28615	0.47999		Median		0.9393	0.4368
0.968956	0.484179		75% Percentile		1.106	0.4957
1.01348	0.455481		Maximum		1.835	0.8423
0.91711	0.423983
0.980625	0.495657		Mean		1	0.4356
0.769817	0.600572		Std. Deviation		0.2511	0.1216
1.29542	0.499384		Std. Error of Mean		0.03515	0.01774
1.22418	0.493835
1.18221	0.333267		Lower 95% CI		0.9294	0.3999
1.39838	0.262708		Upper 95% CI		1.071	0.4713
0.995966	0.457358
0.911235	0.55297		Mean ranks		72.63	24.4
0.822206	0.434781
0.63596	0.364059
0.830774
0.889066
1.29899
1.0631

## Sheet: fig5 sup 1I
Mito SOX							Mito SOX
GST		DRP1					GST		DRP1
PBS	H2O2	PBS	H2O2				PBS	H2O2	PBS	H2O2
0.824606	5.71453	0.716219	10.4733			Mean	1	10.1564	1.69499	20.9764
0.403783	2.38356	0.233293	24.8283			SD	0.672734	8.4961	0.98355	10.4206
1.73454	5.38531	0.493784	18.3893			N	40	43	48	47
0.488	17.1118	0.831952	8.22578			p-value vs PBS(GST)	-----	<0.0001	0.9643	<0.0001
0.406682	16.9124	1.27824	21.2216			p-value vs H2O2(GST)	-----	-----	<0.0001	<0.0001
0.829928	6.65919	1.14667	21.9468			Test	Bonferroni's multiple comparisons
0.440929	9.16833	1.82496	13.3424
1.32917	6.86651	3.02169	11.4235
0.778409	8.04536	1.60294	9.41168
2.04169	17.0414	0.791026	12.1556		Table Analyzed			CellROX						Compare cell means regardless of rows and columns
0.539163	22.1315	0.220181	18.1553
0.485693	15.599	1.57237	13.9114		Two-way ANOVA			Ordinary						Number of families			1
0.337511	37.5671	2.12475	16.7713		Alpha			0.05						Number of comparisons per family			6
1.22062	23.6881	0.840379	18.17											Alpha			0.05
1.63523	19.9664	0.501148	14.3689		Source of Variation			% of total variation	P value	P value summary	Significant?
3.32693	2.67727	0.427627	12.491		Interaction			5.675	<0.0001	****	Yes			Tukey's multiple comparisons test			Predicted (LS) mean diff.	95.00% CI of diff.	Below threshold?	Summary	Adjusted P Value
2.30423	3.02866	0.904314	28.4116		Row Factor			7.34	<0.0001	****	Yes
1.47547	11.3527	1.35956	14.2179		Column Factor			44.77	<0.0001	****	Yes			GST:PBS vs. GST:H2O2			-9.156	-13.04 to -5.271	Yes	****	<0.0001
0.696155	14.6114	1.00381	21.5524											GST:PBS vs. DRP1:PBS			-0.695	-4.482 to 3.092	No	ns	0.9643
1.23263	28.4528	1.15761	36.9876		ANOVA table			SS (Type III)	DF	MS	F (DFn, DFd)	P value		GST:PBS vs. DRP1:H2O2			-19.98	-23.78 to -16.17	Yes	****	<0.0001
0.384409	18.8495	1.99467	28.1816		Interaction			1134	1	1134	F (1, 174) = 24.40	P<0.0001		GST:H2O2 vs. DRP1:PBS			8.461	4.747 to 12.18	Yes	****	<0.0001
0.463079	4.45765	1.94258	39.304		Row Factor			1467	1	1467	F (1, 174) = 31.56	P<0.0001		GST:H2O2 vs. DRP1:H2O2			-10.82	-14.55 to -7.087	Yes	****	<0.0001
0.101144	5.06724	1.6246	31.3062		Column Factor			8949	1	8949	F (1, 174) = 192.5	P<0.0001		DRP1:PBS vs. DRP1:H2O2			-19.28	-22.91 to -15.65	Yes	****	<0.0001
0.582002	4.85268	0.484414	44.873		Residual			8090	174	46.49
0.794989	4.51216	2.46237	27.5713
0.703684	6.91546	1.37645	13.0066		Difference between column means									Test details			Predicted (LS) mean 1	Predicted (LS) mean 2	Predicted (LS) mean diff.	SE of diff.	N1	N2	q	DF
0.666909	6.49055	1.37687	19.8582		Predicted (LS) mean of PBS			1.347
1.3792	29.9903	1.07477	43.665		Predicted (LS) mean of H2O2			15.57						GST:PBS vs. GST:H2O2			1	10.16	-9.156	1.498	40	43	8.645	174
1.29837	10.7839	2.41101	24.2754		Difference between predicted means			-14.22						GST:PBS vs. DRP1:PBS			1	1.695	-0.695	1.46	40	48	0.6733	174
0.854572	4.70366	1.89314	32.4231		SE of difference			1.025						GST:PBS vs. DRP1:H2O2			1	20.98	-19.98	1.467	40	47	19.26	174
1.15589	3.66088	2.48597	25.4584		95% CI of difference			-16.24 to -12.20						GST:H2O2 vs. DRP1:PBS			10.16	1.695	8.461	1.432	43	48	8.358	174
1.75977	7.18513	4.09885	40.7326											GST:H2O2 vs. DRP1:H2O2			10.16	20.98	-10.82	1.439	43	47	10.63	174
2.13609	8.61545	3.31568	35.3879		Difference between row means									DRP1:PBS vs. DRP1:H2O2			1.695	20.98	-19.28	1.399	48	47	19.49	174
1.00611	2.3502	3.1694	14.7723		Predicted (LS) mean of GST			5.578
1.22697	7.73459	3.27702	28.3054		Predicted (LS) mean of GJA1-20k			11.34
1.27755	2.97544	1.17762	25.4758		Difference between predicted means			-5.757
0.579082	3.19142	1.16835	9.61868		SE of difference			1.025
0.642978	5.3587	1.87784	6.37244		95% CI of difference			-7.780 to -3.735
0.165498	2.37619	0.498154	9.60953
0.290325	2.22363	1.38538	15.3779		Interaction CI
	12.3171	1.47953	6.88993		Mean diff, A1 - B1			-9.156
	3.29821	2.84556	38.3356		Mean diff, A2 - B2			-19.28
	4.45013	1.91938	20.5779		(A1 -B1) - (A2 - B2)			10.13
		2.03429	9.00934		95% CI of difference			6.079 to 14.17
		2.11181	17.1846		(B1 - A1) - (B2 - A2)			-10.13
		2.6922	13.7532		95% CI of difference			-14.17 to -6.079
		3.0129	18.1069
		4.11607			Data summary
					Number of columns (Column Factor)			2
					Number of rows (Row Factor)			2
					Number of values			178
