# Supplementary material for: Protective mitochondrial fission induced by stress-responsive protein GJA1-20k
Source: eLife. 2021 Oct 5;10:e69207. doi: 10.7554/eLife.69207 (PMC8492060; doi:10.7554/eLife.69207)
Supplement: Figure 5—source data 1. [file elife-69207-fig5-data1.xlsx]

## Sheet: Fig. 5A
Time(min.)	GST							Mean	SD	GJA1-20k								Mean	SD
1.30624	17.8992	19.7279	19.2886	15.8647	16.4781	14.4605	16.3547	17.1534	1.90392	11.2242	15.8024	14.8143	14.217	12.2575	12.6764	10.8144	7.85428	12.4575	2.54494
7.80001	16.774	18.5748	18.1431	14.9991	15.8119	13.5395	15.3738	16.1737	1.78389	10.6602	14.651	13.3882	13.4332	11.3332	11.7283	9.88403	7.42781	11.5633	2.30462
14.3021	16.6324	18.076	17.7423	14.6748	15.4537	13.2831	15.1595	15.8603	1.72006	10.606	14.296	12.7531	13.2494	10.9813	11.4045	9.70456	7.41022	11.3006	2.17644
20.8461	6.5258	8.20476	8.48656	6.44425	6.55495	5.54671	6.01134	6.82491	1.10061	4.94403	6.78234	5.41537	6.03243	5.32785	5.55539	4.38993	3.66582	5.26415	0.958293
27.3448	7.00092	8.2578	8.16619	6.45194	6.79156	5.89306	6.3697	6.99017	0.904416	5.13812	7.07651	5.50047	6.35973	5.47946	5.60012	4.53098	3.78579	5.4339	1.01478
33.8697	7.58837	8.62187	8.27301	6.68776	7.00642	6.17436	6.89484	7.32095	0.881896	5.64453	7.49128	5.84068	6.81186	5.75908	5.96733	4.95796	4.0985	5.8214	1.03787
40.4452	15.1798	16.2335	16.7714	13.8072	14.1272	12.682	15.52	14.903	1.44071	9.63967	12.5967	11.1659	12.9888	10.5708	10.9638	9.52474	7.31692	10.5959	1.8128
46.9446	14.2042	14.786	14.8364	12.2038	12.4895	11.2871	14.0038	13.4016	1.39761	8.51068	11.1747	9.41773	10.765	8.92902	9.18318	8.339	6.67461	9.12424	1.41511
53.4496	13.0085	13.4141	13.3004	10.6034	10.834	9.853	12.0495	11.8661	1.44364	7.52433	10.0744	7.93349	9.1282	7.54801	7.89542	7.2353	5.82201	7.89514	1.26842
60.0497	3.35279	4.26779	4.02384	3.27766	3.4071	2.99704	2.67066	3.42813	0.555017	2.79232	3.93489	2.35081	3.11106	3.07503	3.20871	2.35729	2.21171	2.88023	0.575677
66.5596	3.16855	3.98423	3.87735	3.14799	3.37158	2.9455	2.7721	3.3239	0.455954	2.70751	3.77069	2.25052	2.99416	2.96636	2.97274	2.24639	2.00493	2.73916	0.567821
73.0561	3.04929	4.01429	3.73223	2.99064	3.20735	2.81287	2.65127	3.20828	0.493867	2.53867	3.61544	2.03677	2.87174	2.74116	2.77258	2.19768	1.96748	2.59269	0.539464

## Sheet: Fig. 5B
Max (HEK293)				Max (HEK293)
GST	GJA1-20k			GST	GJA1-20k
9.95922	4.98565		Mean	8.65786	5.30245
9.39984	6.45894		SD	1.18276	0.857373
9.56814	5.89671		N	7	8
7.61273	6.25647		p-value vs GST	-----	0.0003
7.62668	4.80686		Test	Mann-Whitney
7.04013	5.12284
9.39828	5.03761
	3.85453		Table Analyzed			Max
			Column B			GJA1-20k
			vs.			vs.
			Column A			GST
			Mann Whitney test
			P value			0.0003
			Exact or approximate P value?			Exact
			P value summary			***
			Significantly different (P < 0.05)?			Yes
			One- or two-tailed P value?			Two-tailed
			Sum of ranks in column A,B			84 , 36
			Mann-Whitney U			0
			Difference between medians
			Median of column A			9.398, n=7
			Median of column B			5.080, n=8
			Difference: Actual			-4.318
			Difference: Hodges-Lehmann			-3.406
					GST	GJA1-20k
			Number of values		7	8
			Minimum		7.04	3.855
			25% Percentile		7.613	4.852
			Median		9.398	5.08
			75% Percentile		9.568	6.167
			Maximum		9.959	6.459
			Mean		8.658	5.302
			Std. Deviation		1.183	0.8574
			Std. Error of Mean		0.447	0.3031
			Lower 95% CI		7.564	4.586
			Upper 95% CI		9.752	6.019
			Mean ranks		12	4.5

## Sheet: Fig. 5C
Time (min.)	WT																								Mean	SD	Het
1.30754	18.21	8.01	12.71	12.43	20.08	12.48	23.73	16.92	31.71	10.34	15.98	10.08	9.07	6.73	34.44	16.41	27.31	39.71	4.84	3.78	37.48	27.3	31.57	79.29	21.2754	16.2897	25.45	29.66	90.94	125.88	20.51	6.54	8.42	85.68	16.79	21.18	54.24	10.53	20.25	21.19	2.10725	12.5058	1.54594	4.56331	17.2005	4.22219	4.80736	36.673	12.5558
7.8021	16.75	7.31	11.66	9.6	18.6	11.27	21.33	15.67	28.34	9.28	13.95	8.67	8.04	6.01	32.32	16.01	23.91	37.18	4.36	3.45	37.89	25.07	29.77	73.4	19.5767	15.3529	23.64	26.91	82.88	117.77	19.4	5.7	7.8	77.45	15.47	19.75	50.7	9.95	18.86	19.44	1.99137	10.6389	1.40616	4.47035	14.9175	3.87784	5.54405	36.0089	12.6904
14.3297	15.97	7	11.23	11.79	17.61	10.47	20.72	15.53	27.44	8.84	13.72	8.55	7.96	6.12	30.22	15.07	22.5	36.24	4.28	3.32	38.53	24.41	28.93	69.51	18.9983	14.6383	23.04	25.51	79.81	114.14	19.18	5.53	7.6	75.73	14.92	18.97	49.47	9.69	18.18	19.24	1.76619	9.02505	1.31702	4.18907	15.0189	3.70533	6.11084	31.0259	11.5422
20.9225	11.23	3.94	5.3	3.39	10.36	5.27	10.52	8.01	15.22	4.82	6.58	4.92	4.16	3.4	19.91	9.71	15.52	26.11	3.16	1.97	28.37	22.01	26.83	54.87	12.7325	12.1559	15.65	18.8	61.68	86.02	14.45	4	4.81	61.34	12.24	15.67	42.46	8.12	14.68	15.27	1.1706	6.0059	0.873911	2.58036	10.3517	1.97426	4.7729	24.5671	8.47463
27.4168	9.82	3.94	5.59	6.16	10.33	5.69	9.95	7.86	14.44	4.35	6.79	4.63	4.2	3.19	19.93	9.47	14.67	23.74	3.03	1.87	29.14	20.35	24.98	54.43	12.4396	11.8289	16.14	18.36	60.32	84.05	14.46	4.04	4.85	61.31	11.73	15.57	43.63	7.9	15.08	15.35	1.19764	7.00791	0.8948	2.9323	10.2138	2.72883	4.69226	25.0653	9.88478
33.9225	9.26	3.77	5.43	2.91	9.78	5.76	9.88	7.4	15.71	4.61	6.75	4.6	4.06	3.18	19.35	9.75	13.4	23.45	2.97	1.91	28.75	20.57	24.58	55.92	12.2396	12.118	16.46	18.99	61.37	86.03	14.96	4.25	5.15	60.82	11.81	15.89	44.56	7.99	15.33	15.25	1.34572	6.93865	0.974996	3.10728	11.7961	2.74351	4.74458	26.2225	9.29413
40.7239	19.01	7.59	11.59	14.81	22.78	12.65	22.93	19.49	29.74	9.61	15.61	9.65	8.54	7.18	31.71	16.32	26.42	43.44	5.33	4.11	39.42	27.9	37.33	75	21.59	15.9638	26.86	30.73	92.88	144.42	23.91	6.63	9.72	96.58	15.44	20.58	60.9	11.08	22.35	27.77	3.20119	18.9292	2.66678	9.5587	25.9672	7.13922	6.00212	45.6584	17.6347
47.5169	20.86	8.15	12.57	12.91	24.31	13.12	25.77	21.58	32.03	10.01	16.24	9.94	9.21	7.21	32.62	16.85	26.43	44.15	5.47	4.36	40.03	29.04	39.97	79.95	22.6158	16.8745	29.17	32.74	101.21	156.07	26.05	7.32	11.27	101.32	16.13	20.99	61.4	12.01	22.88	28.58	3.74444	22.6502	2.89287	11.1552	29.1567	8.3277	6.41387	53.5323	19.0075
54.2624	22.77	8.47	13.3	16.35	26.47	13.77	28.07	22.37	33.59	10.56	16.43	10.34	9.8	8.13	35.08	17.85	26.8	49.73	6.24	4.79	39.35	29.53	41.25	82.03	23.8779	17.3975	33.49	36.58	114.15	174.62	29.79	8.55	12.82	105.02	16.33	21.33	62.93	12.24	23.47	29.69	4.07075	23.3993	2.97924	11.5044	29.483	8.65107	6.51766	60.1226	20.6173
60.8269	5.88	2.44	3.3	1.55	7.09	3.4	5.58	3.73	8.31	2.37	3.53	2.25	1.83	2.26	11.7	7.36	10.63	11.37	1.94	0.96	17.38	11.58	14.89	30.24	7.14875	6.74114	9.03	10.44	40.67	49.92	8.69	2.46	2.97	41.32	7.09	8.38	24.26	4.96	8.01	7.35	1.02321	3.92674	0.620941	1.66045	9.40381	1.51388	3.84941	26.5152	7.52309
67.3393	5.47	2.29	3.25	4.84	6.91	3.2	5.71	3.57	8.22	2.5	3.07	2.32	1.78	1.58	11.66	6.94	8.88	13.79	1.9	0.93	14.83	10.33	13.28	28	6.88542	6.16291	9.3	9.81	37.75	48.53	8.02	2.3	2.62	38.12	6.81	8.22	23.4	4.48	8.19	7.67	0.888603	3.14134	0.637926	1.69466	9.77877	1.95504	3.54359	25.3576	8.27595
73.8742	4.81	2.05	2.78	1.27	6.84	3.12	5.43	3.08	7.32	2.34	2.62	2.19	1.58	1.64	11.5	6.82	8.33	15.2	1.81	0.88	14.45	9.96	12.46	25.5	6.41583	5.95969	9.13	9.41	34.56	45.57	7.8	2.23	2.73	36.23	6.5	7.83	22.92	4.38	7.77	7.79	0.974004	3.67853	0.651463	1.61448	9.838	1.96439	3.69031	23.688	7.29688
[truncated: 21 more columns]

## Sheet: Fig. 5D
Max (Neo CM)					Max (Neo CM)
WT	het	M213L			WT	het	M213L
17.96	24.36	19.41		Mean	17.4621	24.8154	35.6706
6.42	27.17	10.62		SEM	2.39458	6.0254	8.48149
10.52	79.59	24.36		N	24	24	16
15.08	129.05	27.17		p-value vs WT	-----	>0.9999	0.0716
19.63	21.99	79.59		Test	Dunn's multiple comarisons
10.65	6.32	129.1
22.64	10.09	21.99
19.29	68.79	6.32			Table Analyzed				max
26.27	9.83	10.09
8.22	13.5	17.98			Kruskal-Wallis test
13.81	40.01	18.59			P value				0.0749
8.15	7.86	25.47			Exact or approximate P value?				Approximate
8.22	15.7	31.45			P value summary				ns
6.49	21.9	24.98			Do the medians vary signif. (P < 0.05)?				No
23.58	3.1	33.48			Number of groups				3
11.03	19.72	90.13			Kruskal-Wallis statistic				5.183
18.47	2.33
34.53	9.89				Data summary
4.43	19.65				Number of treatments (columns)				3
3.91	6.69				Number of values (total)				64
24.9	2.83
19.57	36.43				Number of families			1
28.79	13.32				Number of comparisons per family			2
56.53	5.45				Alpha			0.05
					Dunn's multiple comparisons test			Mean rank diff.	Significant?	Summary	Adjusted P Value	A-?
					WT vs. het			-0.8125	No	ns	>0.9999	B	het
					WT vs. KO			-12.61	No	ns	0.0716	C	KO
					Test details			Mean rank 1	Mean rank 2	Mean rank diff.	n1	n2	Z
					WT vs. het			29.04	29.85	-0.8125	24	24	0.1512
					WT vs. KO			29.04	41.66	-12.61	24	16	2.099
							WT	het	KO
					Number of values		24	24	16
					Minimum		3.91	2.33	6.32
					25% Percentile		8.22	6.983	18.13
					Median		16.52	14.6	24.67
					75% Percentile		23.35	26.47	32.97
					Maximum		56.53	129.1	129.1
					Mean		17.46	24.82	35.67
					Std. Deviation		11.73	29.52	33.92
					Std. Error of Mean		2.395	6.025	8.479
					Lower 95% CI		12.51	12.35	17.59
					Upper 95% CI		22.42	37.28	53.74
					Mean ranks		29.04	29.85	41.66

## Sheet: Fig. 5F
Infarct size				Infarct size
WT	M213L(het)			WT	M213L(het)
43.2338	87.6138		Mean	40.0372	88.891
33.6289	87.0091		SEM	4.34863	0.935793
32.4103	90.8867		N	4	4
50.8757	90.0542		p-value vs WT	-----	0.0286
			Test	Mann-Whitney
			Table Analyzed			Infarct size
			Column B			Het
			vs.			vs.
			Column A			WT
			Mann Whitney test
			P value			0.0286
			Exact or approximate P value?			Exact
			P value summary			*
			Significantly different (P < 0.05)?			Yes
			One- or two-tailed P value?			Two-tailed
			Sum of ranks in column A,B			10 , 26
			Mann-Whitney U			0
			Difference between medians
			Median of column A			38.43, n=4
			Median of column B			88.83, n=4
			Difference: Actual			50.4
			Difference: Hodges-Lehmann			50.52
					WT	Het
			Number of values		4	4
			Minimum		32.41	87.01
			25% Percentile		32.71	87.16
			Median		38.43	88.83
			75% Percentile		48.97	90.68
			Maximum		50.88	90.89
			Mean		40.04	88.89
			Std. Deviation		8.697	1.872
			Std. Error of Mean		4.349	0.9358
			Lower 95% CI		26.2	85.91
			Upper 95% CI		53.88	91.87
			Mean ranks		2.5	6.5

## Sheet: Fig. 5H
DHE intensity				DHE intensity
WT	M213L(het)			WT	M213L(het)
0.906636	0.738415		Mean	1	1.29021
0.801828	0.898431		SEM	0.166807	0.229208
0.793071	0.778935		N	30	30
0.764546	1.01005		p-value vs WT	-----	0.0358
1.26534	1.02299		Test	Mann-Whitney
1.19016	0.897659
1.03688	0.705163
1.34604	0.628153		Table Analyzed		total intensity (clear back)
1.46636	1.08374
1.613	1.67152		Column B			Het
1.15633	1.54652		vs.			vs.
1.01998	2.01114		Column A			WT
1.10918	1.57031
0.905593	1.55015		Mann Whitney test
1.11092	1.7915		P value			0.0358
0.922111	1.8478		Exact or approximate P value?			Exact
0.761544	1.83587		P value summary			*
0.864373	1.379		Significantly different (P < 0.05)?			Yes
0.907855	1.7118		One- or two-tailed P value?			Two-tailed
0.801256	1.50181		Sum of ranks in column A,B			773 , 1057
0.322101	0.904382		Mann-Whitney U			308
0.574411	1.39256
1.73278	0.789165		Difference between medians
0.414081	0.717833		Median of column A			0.9710, n=30
1.09715	1.78587		Median of column B			1.277, n=30
0.443761	1.32617		Difference: Actual			0.3062
1.10496	1.12322		Difference: Hodges-Lehmann			0.2741
1.36007	0.909825
0.915213	2.34804				WT	Het
1.29249	1.22826		Number of values		30	30
			Minimum		0.3221	0.6282
			25% Percentile		0.7992	0.8982
			Median		0.971	1.277
			75% Percentile		1.209	1.682
			Maximum		1.733	2.348
			Mean		1	1.29
			Std. Deviation		0.3336	0.4584
			Std. Error of Mean		0.06091	0.08369
			Lower 95% CI		0.8754	1.119
			Upper 95% CI		1.125	1.461
			Mean ranks		25.77	35.23

## Sheet: Fig. 5J
Mitochondria size							Mitochondria size
WT		M213L(het)					WT		M213L(het)
Basal	post-I/R	Basal	post-I/R				Basal	post-I/R	Basal	post-I/R
0.599213	2.58693	1.41213	1.25749			Mean	1	1.41929	1.03166	1.78358
1.58287	3.67582	1.32622	1.04916			SD	0.697392	0.602451	0.471677	0.915819
0.304976	1.06312	2.19712	1.36702			N	240	230	225	224
0.556259	1.01694	0.556259	1.07386			p-value vs WT Basal	-----	<0.0001	>0.9999	<0.0001
0.853718	0.922445	0.47035	1.28648			p-value vs WT IR	-----	-----	<0.0001	<0.0001
0.977212	0.996541	0.400549	1.39924			p-value vs het IR	-----	-----	<0.0001	-----
0.391959	0.89882	0.998689	1.05668			Test	Bonferroni's multiple comparisons
0.238397	0.745258	0.933184	1.68918
0.621764	0.68727	1.2242	1.14581
0.792508	0.738815	1.01372	1.39817
0.736667	2.1606	1.07708	1.09748			Table Analyzed			mitochondria size						Compare cell means regardless of rows and columns
0.526191	2.26369	0.73452	1.78153
1.23923	1.04379	0.840832	1.08675			Two-way ANOVA			Ordinary						Number of families			1
0.576662	0.7764	1.42823	1.89107			Alpha			0.05						Number of comparisons per family			6
0.519748	1.15225	0.59277	1.31977												Alpha			0.05
0.73452	1.81375	1.67844	1.11467			Source of Variation			% of total variation	P value	P value summary	Significant?
0.569145	2.13054	1.25212	2.59981			Interaction			1.199	0.0003	***	Yes			Bonferroni's multiple comparisons test			Predicted (LS) mean diff.	95.00% CI of diff.	Below threshold?	Summary	Adjusted P Value
0.528339	1.84596	0.8709	1.74717			Row Factor			14.86	<0.0001	****	Yes
0.257726	0.969695	1.1093	1.92006			Column Factor			1.699	<0.0001	****	Yes			Basal:WT vs. Basal:Het			-0.03166	-0.2011 to 0.1378	No	ns	>0.9999
0.336118	2.43444	0.966473	1.94369												Basal:WT vs. IR:WT			-0.4193	-0.5877 to -0.2508	Yes	****	<0.0001
0.834389	0.923519	1.59898	1.54958			ANOVA table			SS (Type III)	DF	MS	F (DFn, DFd)	P value		Basal:WT vs. IR:Het			-0.7836	-0.9532 to -0.6140	Yes	****	<0.0001
0.670088	1.28004	1.36273	1.15332			Interaction			6.351	1	6.351	F (1, 915) = 13.32	P=0.0003		Basal:Het vs. IR:WT			-0.3876	-0.5588 to -0.2164	Yes	****	<0.0001
0.432765	1.67522	0.623912	1.63763			Row Factor			78.73	1	78.73	F (1, 915) = 165.1	P<0.0001		Basal:Het vs. IR:Het			-0.7519	-0.9242 to -0.5796	Yes	****	<0.0001
0.520822	1.97375	1.60112	1.39172			Column Factor			8.998	1	8.998	F (1, 915) = 18.87	P<0.0001		IR:WT vs. IR:Het			-0.3643	-0.5357 to -0.1929	Yes	****	<0.0001
0.385515	2.71794	0.834389	1.97805			Residual			436.2	915	0.4767
0.366186	2.70935	0.656128	1.70744
1.89751	1.56139	0.377998	1.25105			Difference between column means									Test details			Predicted (LS) mean 1	Predicted (LS) mean 2	Predicted (LS) mean diff.	SE of diff.	N1	N2	t	DF
0.453169	1.23386	1.26823	1.19198			Predicted (LS) mean of DMSO			1.21
0.501492	1.18876	1.63227	1.35736			Predicted (LS) mean of LatA(100nM)			1.408						Basal:WT vs. Basal:Het			1	1.032	-0.03166	0.06407	240	225	0.4941	915
0.607804	1.08889	1.24568	1.0148			Difference between predicted means			-0.198						Basal:WT vs. IR:WT			1	1.419	-0.4193	0.06371	240	230	6.581	915
0.327527	1.01587	1.56139	0.91815			SE of difference			0.04557						Basal:WT vs. IR:Het			1	1.784	-0.7836	0.06415	240	224	12.22	915
0.314641	1.76542	1.42716	1.07708			95% CI of difference			-0.2874 to -0.1085						Basal:Het vs. IR:WT			1.032	1.419	-0.3876	0.06474	225	230	5.987	915
0.511157	1.0803	1.83093	2.46558												Basal:Het vs. IR:Het			1.032	1.784	-0.7519	0.06517	225	224	11.54	915
0.493975	1.19843	1.39709	1.09748			Difference between row means									IR:WT vs. IR:Het			1.419	1.784	-0.3643	0.06482	230	224	5.62	915
0.747406	1.11681	1.69348	1.19843			Predicted (LS) mean of GST			1.016
1.30259	1.44541	1.34662	1.5324			Predicted (LS) mean of GJA1-20k			1.601
0.459612	1.04809	1.46367	1.37561			Difference between predicted means			-0.5856
0.514379	0.793582	0.499344	1.40031			SE of difference			0.04557
0.487532	1.28004	0.670088	1.00943			95% CI of difference			-0.6750 to -0.4962
1.95228	1.61938	1.22313	1.39709
0.553037	1.11467	1.11789	1.71495			Interaction CI
0.55089	0.997615	1.17802	2.31309			Mean diff, A1 - B1			-0.03166
0.789286	0.942848	1.17373	1.11789			Mean diff, A2 - B2			-0.3643
0.511157	0.714116	0.518674	1.134			(A1 -B1) - (A2 - B2)			0.3326
1.42072	0.670088	1.25856	1.65052			95% CI of difference			0.1538 to 0.5115
0.619617	0.661497	1.00621	2.35175			(B1 - A1) - (B2 - A2)			-0.3326
1.29185	0.919223	1.79012	1.11144			95% CI of difference			-0.5115 to -0.1538
0.91278	0.921371	1.4089	1.72354
0.346857	0.966473	1.1995	1.78583			Data summary
1.13722	1.0352	0.316788	0.96003			Number of columns (Column Factor)			2
0.859087	0.962178	0.615321	2.02422			Number of rows (Row Factor)			2
0.34793	0.86553	1.19735	0.980433			Number of values			919
0.469276	1.6269	1.20272	2.05644
0.370481	1.17265	0.568071	1.63119
1.60112	1.22098	0.847275	2.01349
2.25618	1.27252	0.88486	1.3434
0.655054	0.793582	0.664719	1.70636
0.674384	0.981507	0.533708	0.663645
0.686196	0.928888	0.447799	1.64193
0.714116	1.71173	0.590623	1.56461
0.507935	2.46451	0.495049	1.01372
1.06312	0.864457	0.627134	3.8369
0.460686	1.9759	0.99332	2.41404
0.761366	1.21668	0.868752	1.53025
0.754923	1.39924	0.529413	1.81697
0.633577	1.53025	0.970769	1.29937
1.00084	1.17802	1.88784	1.08352
0.691565	1.43682	0.921371	1.77616
1.38098	0.563776	0.890229	1.84704
0.293164	0.680827	0.98795	2.30235
1.28434	0.838684	1.48944	4.75827
1.0556	1.82449	0.752775	1.49481
0.386589	1.28111	0.608878	1.78046
1.35843	0.618543	0.724855	1.10607
2.01993	1.19735	0.455316	1.76005
2.75445	1.74073	1.14044	3.2495
1.1544	0.767809	2.61914	5.02674
1.48944	0.88486	1.46474	3.92388
0.964326	0.619617	1.60005	2.90586
1.01587	0.862309	0.576662	1.23709
2.10369	1.06742	1.3391	1.12433
0.919223	2.03389	0.763514	2.3088
1.48515	1.39709	0.761366	1.63871
0.82365	1.4336	1.4873	1.01372
1.69562	1.68059	0.41451	1.15332
0.704452	1.17588	1.09963	1.05453
0.418805	1.23494	0.902042	1.14903
3.73059	0.96003	1.05346	1.1254
0.931036	2.58263	1.76113	1.7622
1.00513	2.03926	0.351152	1.18984
0.260948	3.126	1.49911	1.18232
0.413436	1.94476	1.79334	1.0148
0.460686	1.20487	0.80432	1.1501
0.825798	1.26393	1.04701	1.41642
0.862309	1.40246	0.941774	1.18339
1.04594	1.1748	1.03413	2.15201
1.58609	1.12111	0.935331	1.53669
0.933184	3.04547	2.15738	2.0457
1.14688	0.793582	0.514379	0.787139
0.825798	0.938553	1.23064	0.999763
0.936405	2.82962	1.76865	1.4626
0.3533	1.2693	0.602435	1.82341
1.00728	1.19843	0.725929	1.36273
1.00943	1.76972	0.359743	1.66878
0.802173	1.95765	1.08138	1.28434
1.49803	1.6473	1.52166	1.2038
0.801099	2.69539	0.338266	1.57857
0.364038	1.21453	0.44243	2.65028
0.860161	1.41857	0.614247	1.35628
1.16192	0.757071	1.99093	1.18984
0.29209	0.948218	1.56354	1.05775
0.437061	1.21346	0.512231	2.11765
0.572367	0.60673	0.723781	2.9209
1.37884	0.882712	0.765662	1.52595
1.19306	1.72247	1.32299	3.49648
1.21883	0.64002	0.445652	1.34125
1.42394	0.961104	0.982581	1.69777
0.719486	0.910633	0.695861	1.34877
1.58716	1.44434	0.832241	2.59337
0.771031	1.04057	1.0599	2.1692
1.14796	0.923519	1.24246	1.861
0.574515	1.23279	0.57881	0.937479
1.02446	1.18125	0.985803	0.847275
1.43145	1.08675	1.33373	1.42394
0.666867	1.18232	0.728076	1.17265
0.556259	1.16943	0.719486	3.07875
1.79442	0.996541	2.1896	1.26715
0.57881	1.92221	1.13614	1.09534
0.8709	1.35306	0.588475	1.0599
0.520822	1.50877	0.488606	0.97936
3.67904	1.28863	0.825798	0.947144
2.3292	1.09211	1.1995	1.14366
0.899894	0.761366	0.574515	1.25427
1.23709	1.37669	1.43253	1.20594
0.94607	1.09319	1.08782	1.33588
1.39065	1.77079	0.919223	1.28971
0.595992	1.48193	0.373703	1.23816
0.501492	1.23172	0.558407	2.03281
0.941774	1.16299	1.08997	1.79871
1.25534	1.55495	0.455316	1.28326
1.00621	1.57106	0.521896	1.26178
0.703378	2.13483	0.308198	1.00943
1.8116	1.63763	0.93211	1.32944
1.61938	1.28434	1.44005	1.6269
4.33087	3.315	0.717338	1.4379
1.09856	2.22074	0.775326	5.24043
0.618543	2.33457	0.829019	1.38743
1.89644	4.53383	0.773179	4.6788
1.73536	1.11789	0.485384	4.05811
0.636798	1.06419	0.344709	5.07721
1.08567	1.87603	0.544447	2.51176
0.784991	1.97697	1.33803	5.20392
0.727003	1.56032	0.877343	3.35581
0.658276	2.35712	0.989024	4.48014
2.93056	1.27252	2.01671	4.18161
1.60327	1.47548	1.88462	3.63286
0.800025	1.42179	0.940701	5.40259
4.58753	1.52595	1.58287	2.91875
2.80063	1.95872	0.97399	1.05131
2.55579	2.43229	1.36488	1.08352
4.89035	2.33994	1.1501	1.49052
1.12433	1.21346	1.1297	1.68488
1.08352	2.12409	1.27145	2.04141
0.389811	1.93832	0.469276	1.12111
0.958956	1.05775	0.630355	0.903116
1.16728	1.24782	0.752775	2.29054
0.48968	1.47763	0.767809	1.56891
0.677605	1.60649	1.33051	1.11144
0.841906	1.18769	0.504714	1.5034
0.892377	1.72354	0.400549	2.26799
0.651832	1.2446	0.67331	1.5324
0.723781	0.880564	0.998689	1.73858
0.416657	1.51844	0.499344	1.94691
0.283499	0.700156	0.784991	2.50746
1.02768	1.37776	0.556259	2.76197
1.07493	1.32085	0.835462	2.49243
0.418805	0.83761	0.602435	2.23685
1.13292	1.14366	0.638946	1.57535
0.710895	1.29507	1.44864	2.30021
1.41535	0.808616	0.622838	1.73536
1.47441	1.34125	0.472498	0.892377
1.06956	1.24353	1.82126	1.22098
0.713042	1.16192	1.24997	1.41749
1.49159	0.869826	0.749554	1.30367
0.769957	0.88486	0.943922	1.5324
0.637872	0.935331	0.720559	2.5676
0.862309	0.933184	1.44756	1.82878
0.847275	0.894525	1.1254	1.80516
1.02768	1.63334	1.36488	1.39172
0.557333	1.20057	2.56652	1.99845
0.931036	1.46474	0.747406	2.29484
0.744184	1.97375	0.863383	1.41427
0.651832	1.29078	1.4336	1.24568
0.535856	1.54636	2.1445	2.92519
1.48837	1.09534	1.55387	1.85455
1.72032	1.5571	1.14044	1.58716
0.808616	1.18232	0.940701	1.2489
2.69217	1.22849	2.27014	2.53646
1.09426	1.46904	1.45186	1.672
0.957882	1.21453	0.840832	1.32299
1.00513	2.62129	0.736667	1.2693
1.04701	1.98449	1.4787	2.28732
0.649685	1.82019	1.40568	1.5077
1.11144	1.18017	1.32622	1.29722
1.71388	1.81697	0.771031	0.961104
1.59576	1.47011	1.10393	2.66747
1.15118	1.08675	0.737741	1.18769
0.572367	2.32168	0.976138	1.63441
0.840832	1.90073	1.24675	1.23923
1.77294	3.3397	2.31524	1.88247
0.466055	1.19735	1.38206	5.10405
0.825798	1.11252	1.58716	2.10691
1.7171	1.20809	1.454	1.00513
0.352226	3.09916	1.08675	1.53991
0.591696	1.35843	1.13292	1.84274
1.54851	1.6269	1.18661	2.57189
0.760292	1.36488	0.584179	0.88486
0.737741	1.41749	1.07923	1.54528
0.375851	1.51951	0.621764	1.30689
0.940701	1.25319	0.402697	1.26071
0.481089	1.80301	0.661497	1.59683
0.431691	2.03496	1.23279	2.72116
0.370481	1.09856	1.97053	2.021
1.05453	1.84596	0.471424	1.60864
0.672236	0.897746	0.343635
0.514379	1.26286
1.52595	1.134
1.48085	1.07279
0.652906	0.826872
1.32192	1.3391
0.582032
0.85694
1.24782
0.521896
0.676531
1.9061
0.548742
1.11252
0.441356
0.3533

## Sheet: Fig. 5K
% area of matrix				% area of matrix
WT	M213L(het)			WT	M213L(het)
12.6	35.9		Mean	26.8433	41.3593
13.8	38.3		SEM	0.923198	0.667321
12.4	39.1		N	231	226
12.8	24.8		p-value vs WT	-----	<0.0001
17.4	30.2		Test	Mann-Whitney
10.4	30.4
15.2	45
9.3	60.1		Table Analyzed			% area of matrix
14.1	39
13.6	36.8		Column B			Het
7.3	39.2		vs.			vs.
12.2	37.1		Column A			WT
13	29.9
10.5	48.2		Mann Whitney test
7.9	35.7		P value			<0.0001
16.8	29.4		Exact or approximate P value?			Approximate
9.5	32.7		P value summary			****
17.3	33.1		Significantly different (P < 0.05)?			Yes
19.1	45.2		One- or two-tailed P value?			Two-tailed
25.6	44.3		Sum of ranks in column A,B			36799 , 67854
26.2	34.9		Mann-Whitney U			10003
17.9	42.7
17.8	28.7		Difference between medians
27.9	34.7		Median of column A			26.00, n=231
51.8	24.9		Median of column B			42.55, n=226
58.8	31.8		Difference: Actual			16.55
67.8	34.9		Difference: Hodges-Lehmann			15.9
16.4	24.9
17.8	43.8				WT	Het
10.2	34.9		Number of values		231	226
47	44
17.3	43.2		Minimum		2.8	6.4
35.9	50.2		25% Percentile		16	34.9
8.3	46.2		Median		26	42.55
7.1	58.2		75% Percentile		34.7	48.1
58.1	33.4		Maximum		73.6	70.3
18.1	29.1
55.3	34		Mean		26.84	41.36
11	27.3		Std. Deviation		14.03	10.03
49.2	49.4		Std. Error of Mean		0.9232	0.6673
65	35.1
16.3	35.8		Lower 95% CI		25.02	40.04
10.3	44.2		Upper 95% CI		28.66	42.67
8.9	31.3
7.2	32.2		Mean ranks		159.3	300.2
71.3	35.3
45.6	26.8
73.6	24.3
34.5	21
5	40
63.6	36.3
42	36.5
33.6	46.1
14.4	50.3
10.5	47.4
17.3	45.9
51	30.6
54.7	42.7
36.5	44.8
19.7	37.3
26.9	50
9.1	48.5
18	45.5
46.6	46.9
17	29.8
39.1	33
50.9	41
49.5	44.3
26.9	35.1
23.8	40.8
41.5	35.4
11.3	42.4
37	31.5
40.4	41
14.6	45.2
26	38.9
29.1	44.4
12.2	41.4
32.8	49.9
24.1	48.6
35.2	44.3
42.3	56.3
46.8	58.8
2.8	45.6
4.9	41.8
27.8	49.8
12.4	50.7
18.6	44.7
5.4	36.9
35.2	56.6
28	59
35.5	53.2
43.4	58.1
14.4	56.2
7.1	48.4
8.9	57.1
12.2	59.5
5.2	42.5
18.5	64.6
9.5	70.3
29.6	53.5
21.1	54.4
14.6	46
10.1	55.2
32.2	47.4
16.5	47.3
20.8	43.1
28.5	50
18.8	46.7
30.8	46.4
55.5	53.9
16	41.5
16.6	54.5
14.9	40.9
13.7	39
30.2	26.6
19.8	44.9
26	35.1
29.5	43.6
29.1	34.4
31.1	54.7
31.7	55.2
33.2	48.2
22.5	47.7
29.7	28.1
27.3	52.2
29.3	31.1
17.1	43
17.9	50.8
27.6	44.2
28.2	52
16.8	32.6
43.6	46.3
51.1	42.1
23.9	46.4
24.2	55.6
21.8	14.1
21.2	31.5
29.4	25.1
28.2	37.7
38.7	15
24.1	24.9
33.6	40.7
26.6	39.3
29.6	6.4
35.5	7.1
34.7	14.9
35.8	30.1
34.7	23.1
30.6	38.1
21.2	42.8
33.3	43.7
44.4	39.8
22	32.8
34.5	29.2
21	36.7
17.3	41.4
21.1	41.6
35.5	49.8
36.3	46.4
31.7	32.2
41.2	39.4
31.7	49.4
32.3	44.2
29.3	45.8
31.8	31.5
33.9	43.4
14	49.8
15.2	50.6
30.3	48.2
18.4	50.6
43.5	35.3
27	44.8
28.9	35.5
33.6	46.5
10.1	50.7
19.7	43.8
14.7	35.3
33.4	28.8
24.2	39.8
12	44.8
25.9	44.4
33.2	37.8
62.8	38.4
37.5	45.8
44.8	39.5
43.4	46.4
13.9	46
37.7	34.9
27.1	42.1
44.7	47.5
20.2	50.3
8.5	45.1
8.5	49.4
16.3	52.3
40.3	51.5
15.4	54.9
30.4	53.7
29.2	23.1
29.8	40.1
22.5	55.4
31	61.9
34.6	48.1
44	56.5
46.4	33.4
49.4	43
35.9	36.5
36.4	34.3
24.5	28.4
22.2	44.9
24.2	27.3
22.2	27.8
34.9	31.5
13.2	41
23.5	37.1
19	39.2
25.2	39.6
11.2	48.1
16.6	34.5
33.9	47
26	50.2
42	42.6
33.7	42
43.9	47.6
32.2	42.5
10.3	48.9
12.1
20.9
13.8
40.4
25

## Sheet: Fig. 5L
matrix area distribution (%)
%	WT	M213L(het)
0-10	8	1
11-20	30	1
21-30	24	10
31-40	20	29
41-50	11	41
51-60	4	16
61-70	2	1
71-80	1	0
81-90	0	0
91-100	0	0
