# Supplementary material for: Protective mitochondrial fission induced by stress-responsive protein GJA1-20k
Source: eLife journal article supplement (doi:10.7554/elife.69207), 2021-10-04
Supplement: supp1 [file elife-69207-supp1-v1.zip]

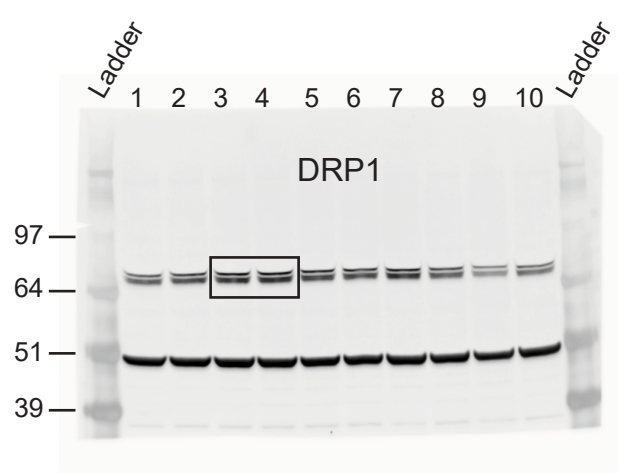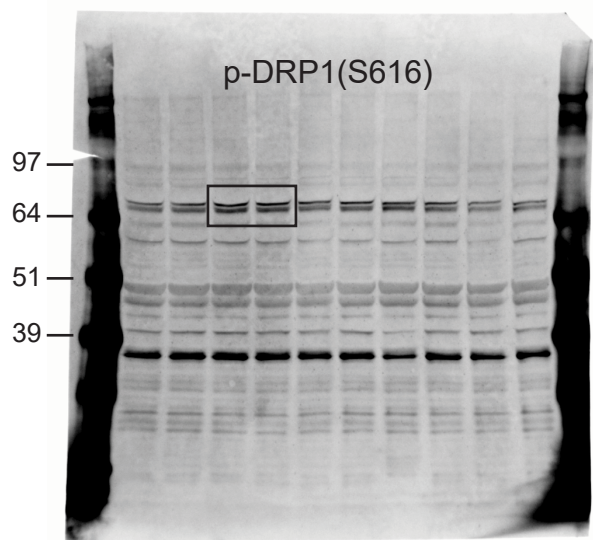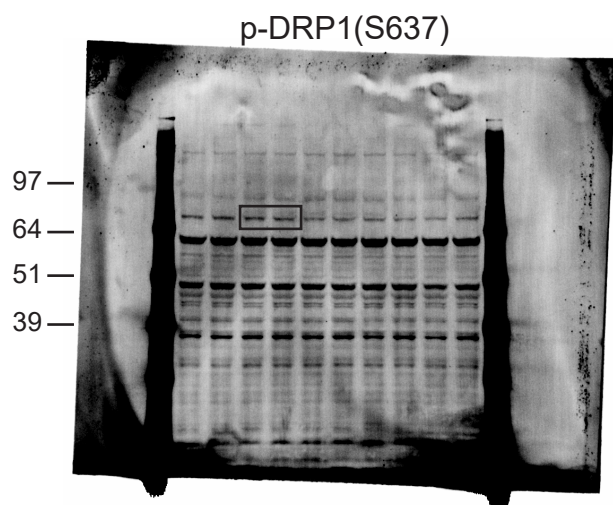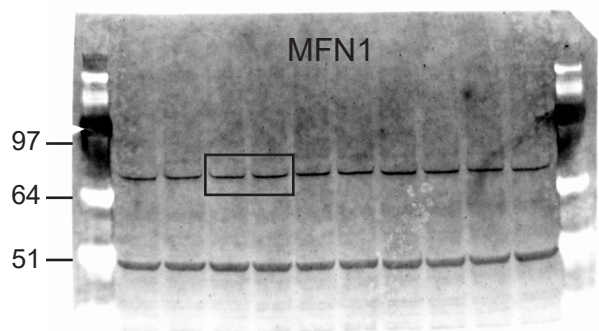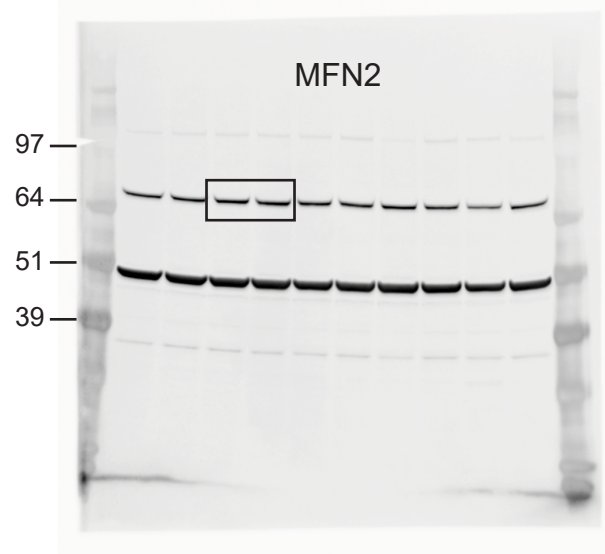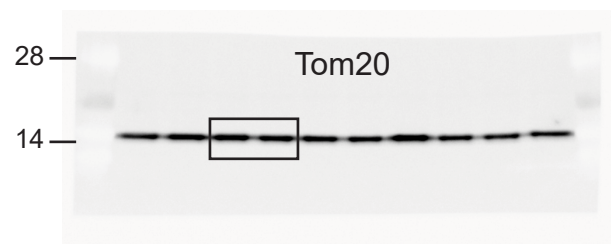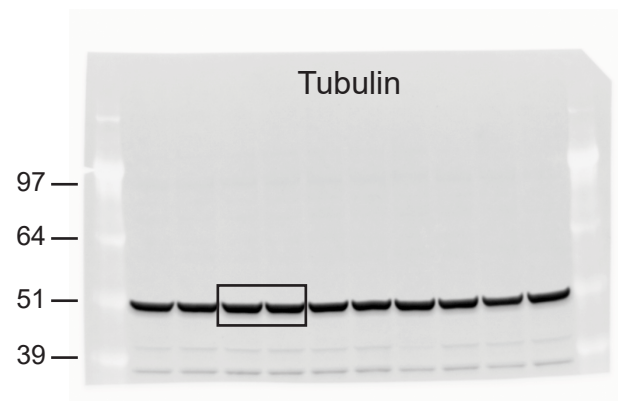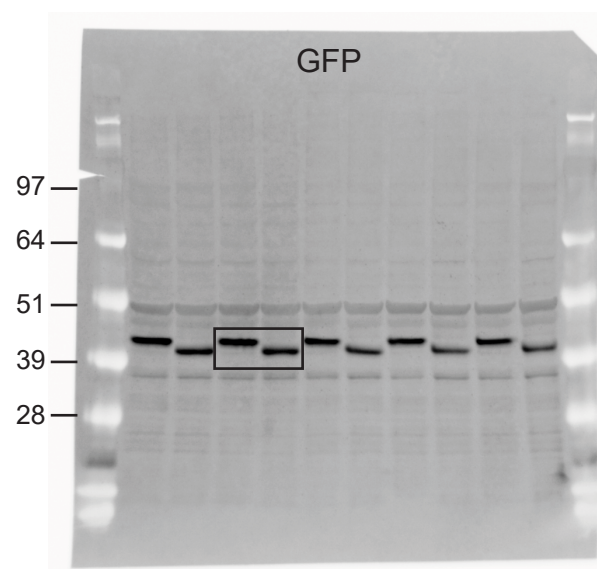

Lane  
 1: GST Sample #1  
 2: GJA1-20k Sample #1  
 3: GST Sample #2  
 4: GJA1-20k Sample #2  
 5: GST Sample #3  
 6: GJA1-20k Sample #3  
 7: GST Sample #4  
 8: GJA1-20k Sample #4  
 9: GST Sample #5  
 10: GJA1-20k Sample #5

Uncropped membrane images. Surrounded area are used for Main Figure 2.

Same order in all membrane

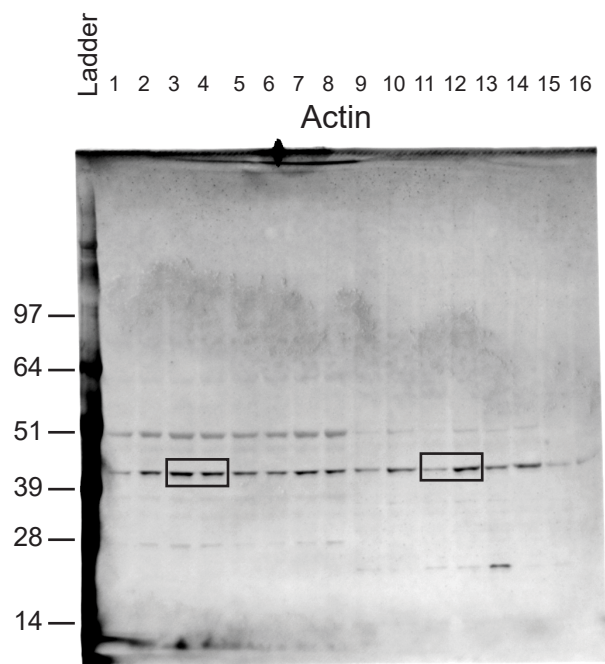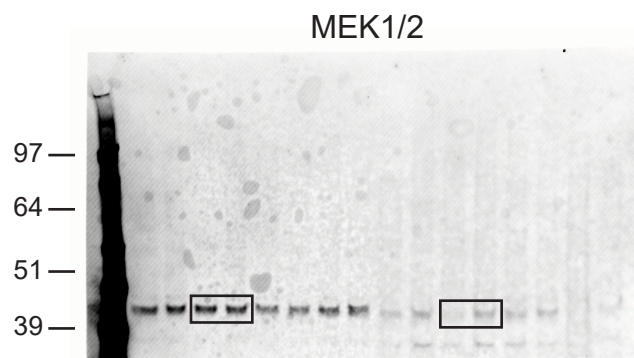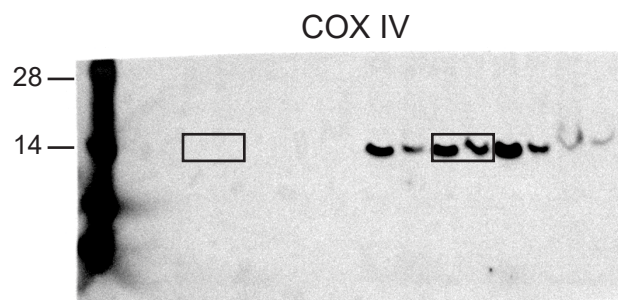

Lane

- 1: GST Sample #1 (Cytosol)
- 2: GJA1-20k Sample #1 (Cytosol)
- 3: GST Sample #2 (Cytosol)
- 4: GJA1-20k Sample #2 (Cytosol)
- 5: GST Sample #3 (Cytosol)
- 6: GJA1-20k Sample #3 (Cytosol)
- 7: GST Sample #4 (Cytosol)
- 8: GJA1-20k Sample #4 (Cytosol)
- 9: GST Sample #1 (Mitochondria)
- 10: GJA1-20k Sample #1 (Mitochondria)
- 11: GST Sample #2 (Mitochondria)
- 12: GJA1-20k Sample #2 (Mitochondria)
- 13: GST Sample #3 (Mitochondria)
- 14: GJA1-20k Sample #3 (Mitochondria)
- 15: GST Sample #4 (Mitochondria)
- 16: GJA1-20k Sample #4 (Mitochondria)

Same order in all membrane

Uncropped membrane images. Surrounded area are used for Main Figure 3.



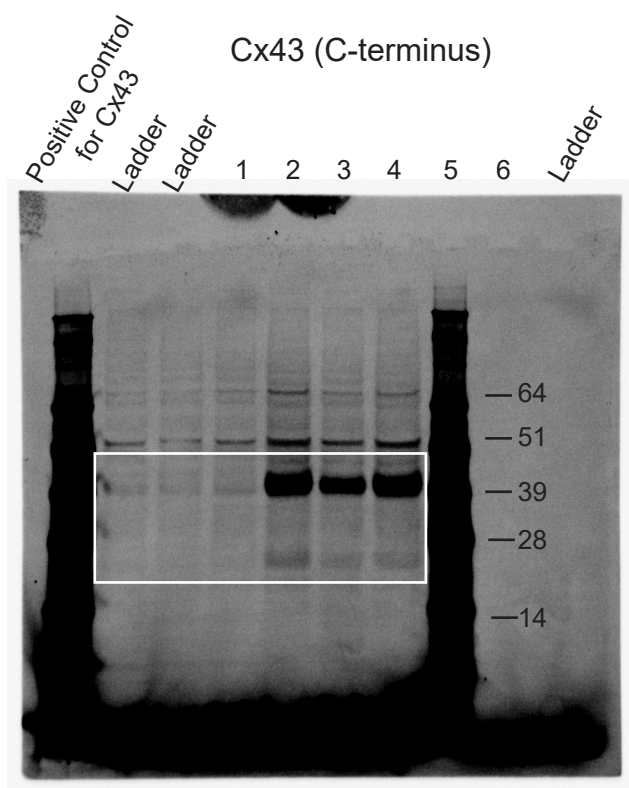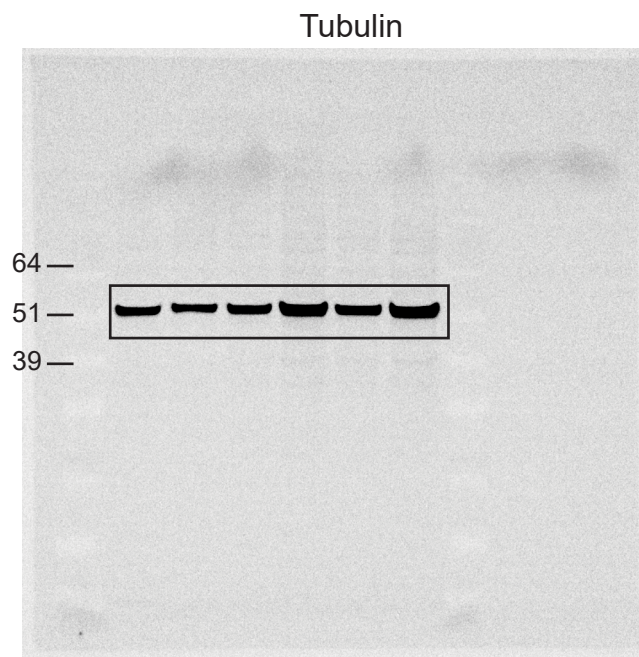

Lane

- 1: Gja1 siRNA Sample #1
- 2: Gja1 siRNA Sample #2
- 3: Gja1 siRNA Sample #3
- 4: Control siRNA Sample #1
- 5: Control siRNA Sample #2
- 6: Control siRNA Sample #3

Same order in all membrane

Uncropped membrane images. Surrounded area are used for Figure 1—figure supplement 1.

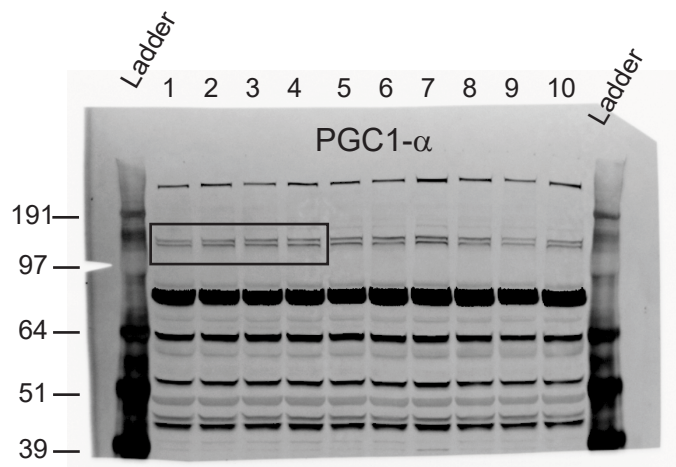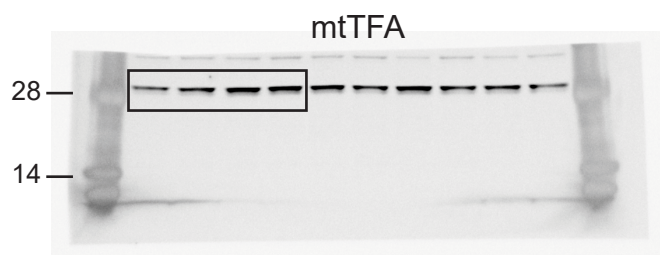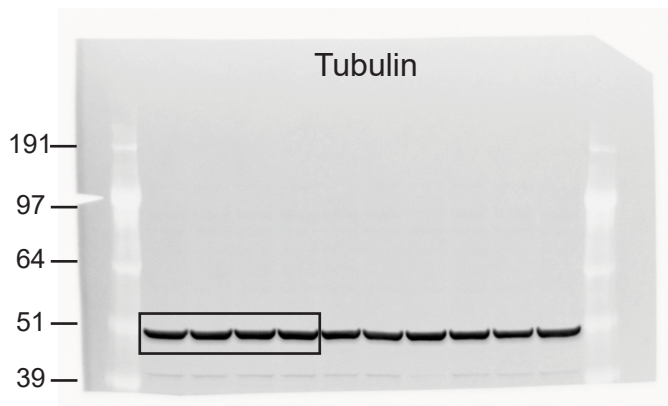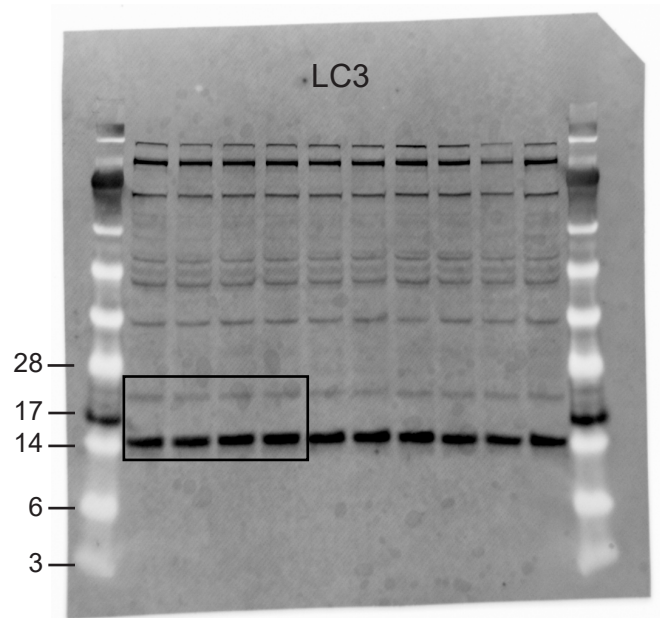

Lane

|                       |                        |
|-----------------------|------------------------|
| 1: GST Sample #1      | 6: GJA1-20k Sample #3  |
| 2: GJA1-20k Sample #1 | 7: GST Sample #4       |
| 3: GST Sample #2      | 8: GJA1-20k Sample #4  |
| 4: GJA1-20k Sample #2 | 9: GST Sample #5       |
| 5: GST Sample #3      | 10: GJA1-20k Sample #5 |

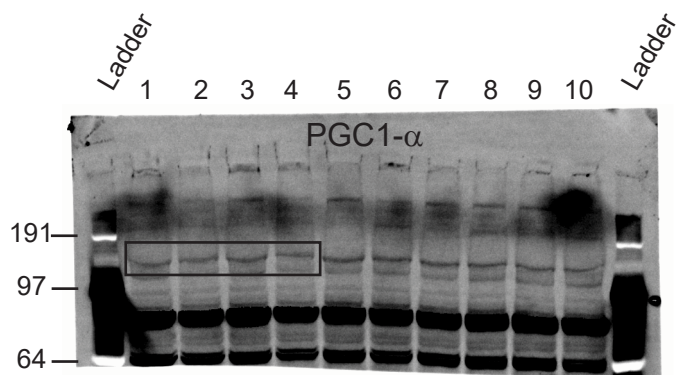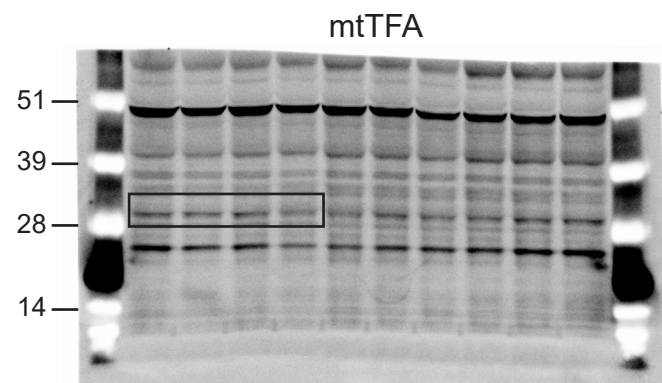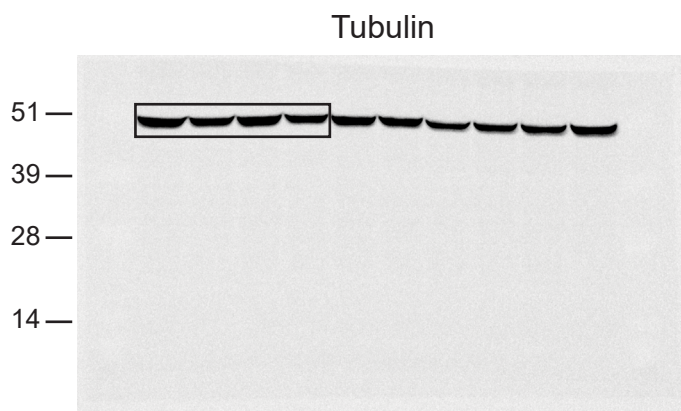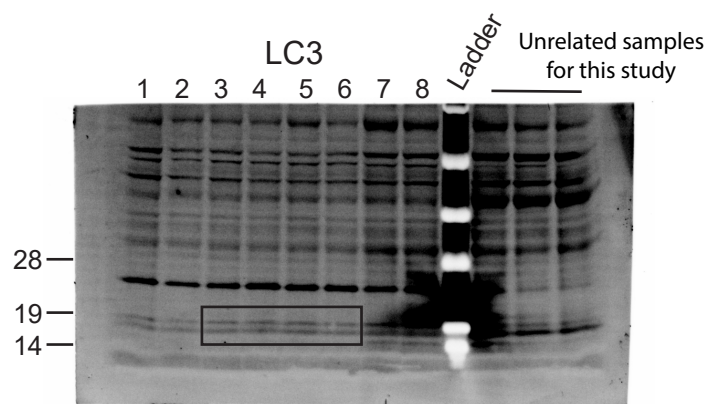

Lane

|                                          |                                           |
|------------------------------------------|-------------------------------------------|
| 1: WT Sample #1                          | 6: Gja1 <sup>M213L/M231L</sup> Sample #3  |
| 2: Gja1 <sup>M213L/M231L</sup> Sample #1 | 7: WT Sample #4                           |
| 3: WT Sample #2                          | 8: Gja1 <sup>M213L/M231L</sup> Sample #4  |
| 4: Gja1 <sup>M213L/M231L</sup> Sample #2 | 9: WT Sample #5                           |
| 5: WT Sample #3                          | 10: Gja1 <sup>M213L/M231L</sup> Sample #5 |

Uncropped membrane images. Surrounded area are used for Figure1—figure supplement 2.



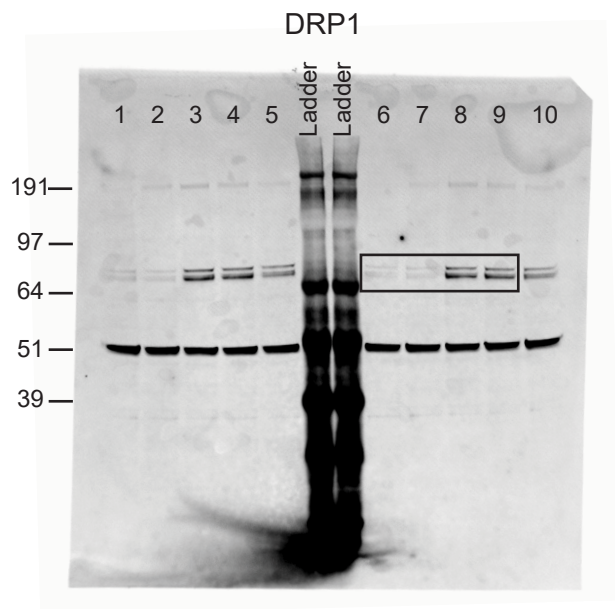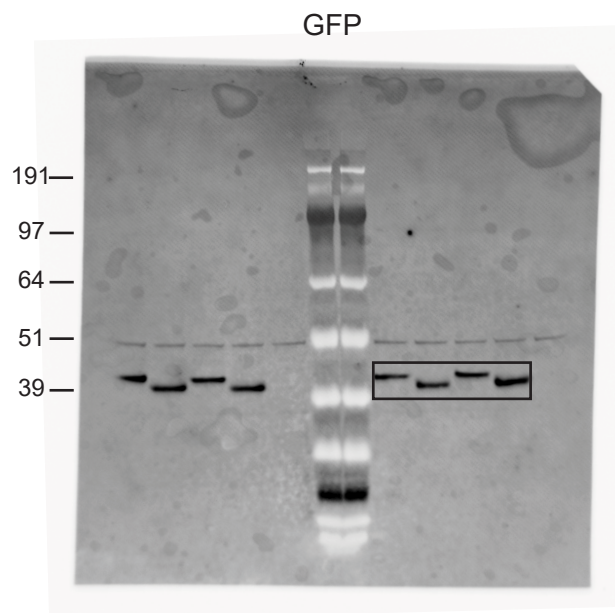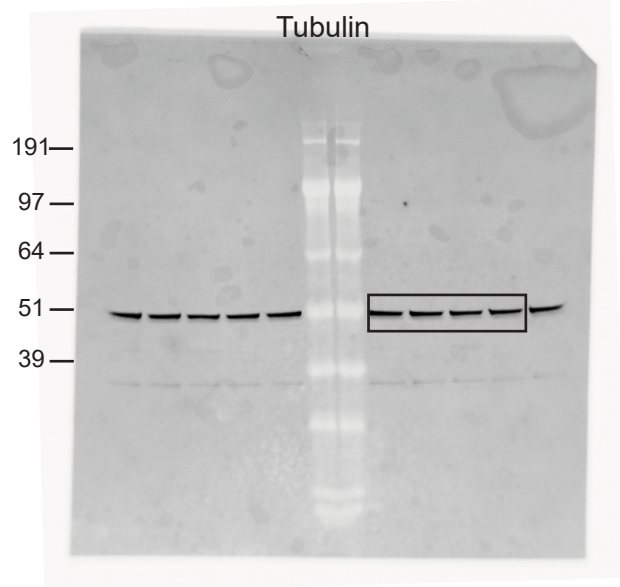

Lane

- 1: GST + DRP1 siRNA Sample #1
- 2: GJA1-20k + DRP1 siRNA Sample #1
- 3: GST + Control siRNA Sample #1
- 4: GJA1-20k + Control siRNA Sample #1
- 5: Blank Control (no transfection, no siRNA)
- 6: GST + DRP1 siRNA Sample #2
- 7: GJA1-20k + DRP1 siRNA Sample #2
- 8: GST + Control siRNA Sample #2
- 9: GJA1-20k + Control siRNA Sample #2
- 10: Blank Control (no transfection, no siRNA)

Same order in all membrane

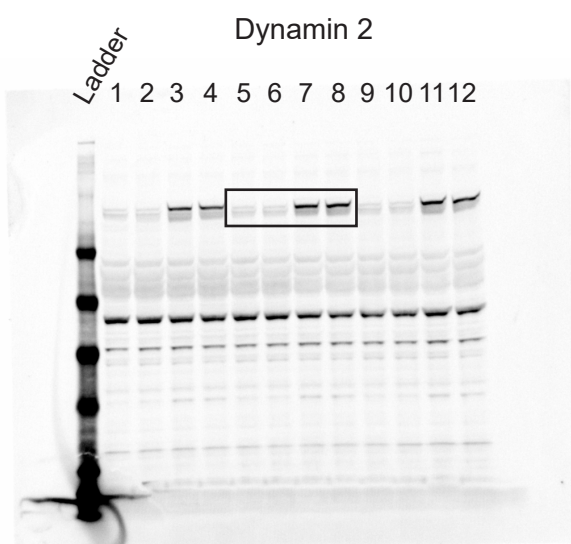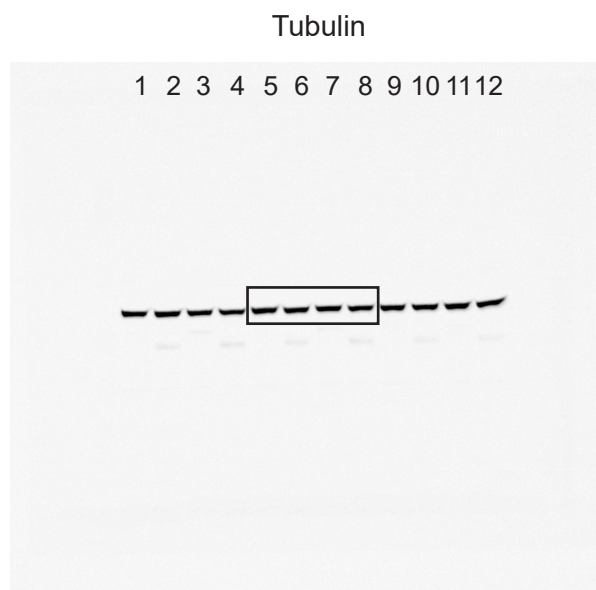

Lane

- 1: GST + DNM2 siRNA Sample #1
- 2: GJA1-20k + DNM2 siRNA Sample #1
- 3: GST + Control siRNA Sample #1
- 4: GJA1-20k + Control siRNA Sample #1

- 5: GST + DNM2 siRNA Sample #2
- 6: GJA1-20k + DNM2 siRNA Sample #2
- 7: GST + Control siRNA Sample #2
- 8: GJA1-20k + Control siRNA Sample #2

- 9: GST + DNM2 siRNA Sample #3
- 10: GJA1-20k + DNM2 siRNA Sample #3
- 11: GST + Control siRNA Sample #3
- 12: GJA1-20k + Control siRNA Sample #3

Uncropped membrane images. Surrounded area are used for Figure 2—figure supplement 1.
